# Supplementary material for: Synthesis and properties of ABA-triblock copolymers from polyester A-blocks and easily degradable polyacetal B-blocks
Source: Royal Society of Chemistry journal article supplement (doi:10.1039/d2py00620k), 2022-01-01
Supplement: d2py00620k13.pdf [file d2py00620k13.pdf]

## Supporting for

### Synthesis and properties of ABA-triblock copolymers from polyesters A-blocks and polyacetals B-blocks with enhanced ability to degradation

Karolina Cichoń, Bartłomiej Kost\*, Malgorzata Basko\*

Centre of Molecular and Macromolecular Studies, Polish Academy of Sciences, Sienkiewicza  
112, 90-363 Lodz, Poland

Mail: [baskomeg@cbmm.lodz.pl](mailto:baskomeg@cbmm.lodz.pl), [kost@cbmm.lodz.pl](mailto:kost@cbmm.lodz.pl)

#### Table of contents:

|                                                                                                                                                                                 |    |
|---------------------------------------------------------------------------------------------------------------------------------------------------------------------------------|----|
| Molar weight calculation.....                                                                                                                                                   | 3  |
| Assay of Sulphur content.....                                                                                                                                                   | 3  |
| Table S1. Conditions of mineralization.....                                                                                                                                     | 3  |
| Table S2. The diffusion coefficient for signals belonging to the PDXL <sub>7000</sub> and PLA <sub>7500</sub> -PDXL <sub>7000</sub> -PLA <sub>7500</sub> block copolymer.....   | 3  |
| Table S3. Thermal properties of selected ABA copolymers (the second heating cycle at a rate of 10 °C/min in a DSC analysis).....                                                | 4  |
| Figure S1. MALDI TOF of purified PDXL <sub>2400</sub> .....                                                                                                                     | 5  |
| Figure S2. The <sup>1</sup> H and <sup>13</sup> C NMR spectra (400 MHz, CDCl <sub>3</sub> ) of purified PDXL <sub>7000</sub> .....                                              | 6  |
| Figure S3. <sup>1</sup> H NMR spectrum, and 2D HSQC NMR (400 MHz, DMSO-d <sub>6</sub> ) of PDXL <sub>2400</sub> diol.....                                                       | 7  |
| Figure S4. SEC trace of polyacetal macroinitiator HO-PDXL <sub>7000</sub> -OH and prepared purified PCL-PDXL <sub>7000</sub> -PCL copolymers. ....                              | 8  |
| Figure S5. The SEC traces of crude and purified a) PLA-PDXL <sub>7000</sub> -PLA copolymer and b) PCL-PDXL <sub>7000</sub> -PCL copolymer.....                                  | 9  |
| Figure S6. SEC curves of polyacetal macroinitiator HO-PDXL <sub>2400</sub> -OH and resulting purified PLA-PDXL <sub>2400</sub> -PLA copolymers.....                             | 10 |
| Figure S7. The <sup>1</sup> H and <sup>13</sup> C NMR spectra (400 MHz, CDCl <sub>3</sub> ) of purified PCL-PDXL <sub>7000</sub> -PCL copolymer.....                            | 11 |
| Figure S8. Assessment of mean static contact angles of PCL-PDXL <sub>7000</sub> -PCL block copolymers in comparison to pure PDXL <sub>7000</sub> and PCL <sub>14000</sub> ..... | 12 |
| Figure S9. The <sup>1</sup> H NMR of the films for the WCA measurements (CDCl <sub>3</sub> , 400 MHz).....                                                                      | 13 |

**Figure S10.** a) The DSC thermograms registered during the second scan and b) TGA curves for starting HO-PDXL<sub>7000</sub>-OH diol, PCL<sub>14000</sub>, and PCL-PDXL<sub>7000</sub>-PCL. For DSC analysis samples were heated at 10 °C/min and cooled at 10 °C/min, whereas for TGA measurement samples were heated at 20 °C/min.....13

**Figure S11.** Acid induced degradation of PLA-PDXL<sub>7000</sub>-PLA copolymer followed by <sup>1</sup>H NMR spectra([acetal units]:[H<sup>+</sup>] = 10:1), (CD<sub>3</sub>CN, 400 MHz).....14

**Figure S12.** The GC spectra of acid induced degradation of PLA-PDXL<sub>7000</sub>-PLA after 122h.....15

## Molecular weight calculation

### Assay of Sulphur content

0.2 g of copolymers were placed into glass vessels, then 65% nitric acid (3 mL) and 36% hydrochloric acid (1 mL) spectrally pure were added. Samples were pre-mineralized at 25 °C within 25 min. by using an ultrasonic bath. Then, the samples were mineralized in the UltraWave closed microwave system in two steps, as presented in the Table 1.

**Table S1.** Conditions of mineralization

| Step | Time [min.] | T1 [°C] | T2 [°C] | Pressure [Ba] | Power [W] |
|------|-------------|---------|---------|---------------|-----------|
| 1    | 25          | 240     | 70      | 110           | 1500      |
| 2    | 10          | 240     | 70      | 110           | 1500      |

After mineralization, the samples were transferred to 25 mL volumetric flasks and filled with deionized water and characterized. The Sulphur content was determined to be 932 ppm.

**Table S2.** The diffusion coefficient for signals belonging to the PDXL<sub>7000</sub> and PLA<sub>7500</sub>-PDXL<sub>7000</sub>-PLA<sub>7500</sub> block copolymer

| PDXL <sub>7000</sub>                                           |                      |
|----------------------------------------------------------------|----------------------|
| Signal [ppm]                                                   | Difusion coefficient |
| 4.75                                                           | $1.26 \cdot 10^{-6}$ |
| 3.70                                                           | $1.26 \cdot 10^{-6}$ |
| PLA <sub>10000</sub>                                           |                      |
| 5.17                                                           | $1.32 \cdot 10^{-6}$ |
| 1.60                                                           | $1.34 \cdot 10^{-6}$ |
| PLA <sub>7500</sub> -PDXL <sub>7000</sub> -PLA <sub>7500</sub> |                      |
| 5.12                                                           | $9.95 \cdot 10^{-7}$ |
| 4.75                                                           | $1.02 \cdot 10^{-6}$ |
| 4.40-4.28                                                      | $1.02 \cdot 10^{-6}$ |
| 3.70                                                           | $9.99 \cdot 10^{-7}$ |
| 1.60                                                           | $1.01 \cdot 10^{-6}$ |

**Table S3.** Thermal  
ABA copolymers (the

properties of selected

second heating cycle at a rate of 10 °C/min in a DSC analysis)

| Copolymer                       | Ester content mol % | DSC        |                 |                      |                    | TGA        |            |
|---------------------------------|---------------------|------------|-----------------|----------------------|--------------------|------------|------------|
|                                 |                     | $T_g$ [°C] | $T_m$ PDXL [°C] | $T_m$ polyester [°C] | $\Delta H_m$ [J/g] | $T_1$ [°C] | $T_2$ [°C] |
| PLA-PDXL <sub>7000</sub> -PLA 1 | 26                  | -41        | -----           | -----                | -----              | 227        | 308        |
| PLA-PDXL <sub>7000</sub> -PLA 2 | 35                  | -26        | -----           | -----                | -----              | 229        | 299        |
| PLA-PDXL <sub>7000</sub> -PLA 3 | 44                  | -13        | -----           | 123                  | 12.78              | 239        | 298        |
| PLA-PDXL <sub>7000</sub> -PLA 4 | 53                  | 3          | -----           | 145                  | 23.51              | 239        | 308        |
| PLA-PDXL <sub>7000</sub> -PLA 5 | 60                  | 3          | -----           | 150                  | 27.24              | 243        | 324        |
| PCL-PDXL <sub>7000</sub> -PCL 1 | 42                  | -63        | 31              | 53                   | 68.34              | 305        | 355        |
| PCL-PDXL <sub>7000</sub> -PCL 2 | 65                  | -65        | 24              | 51                   | 62.74              | 302        | 371        |

$T_g$ ,  $T_m$  - temperature of glass transition and melting

$\Delta H_m$  - polyester enthalpy of melting

$T_1$ ,  $T_2$  - temperature of the maximum decomposition

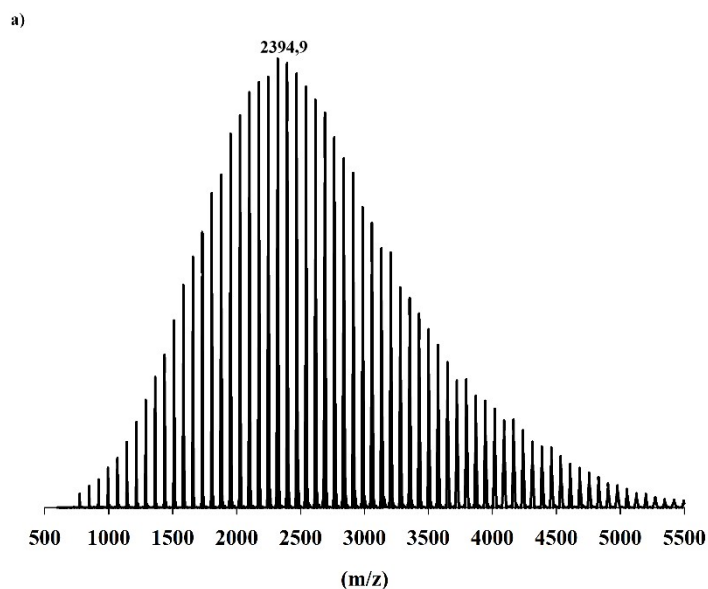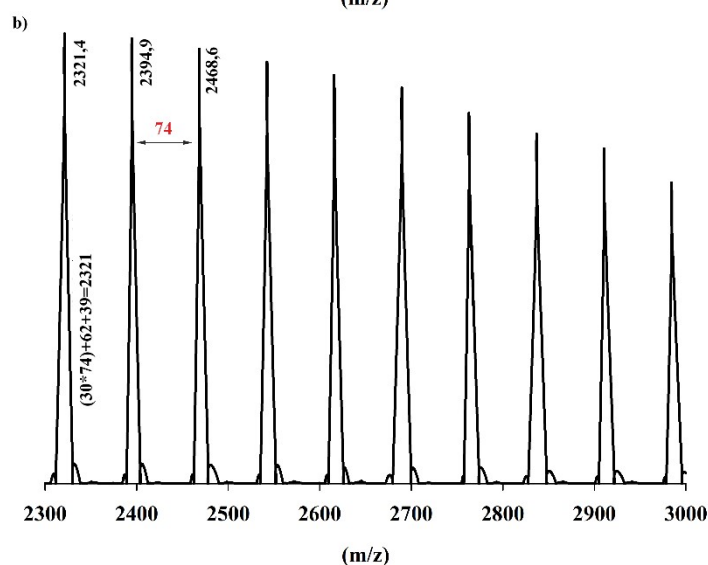

**Figure S1.** MALDI TOF of purified PDXL ( $M_{nNMR} = 2400$  g/mol)

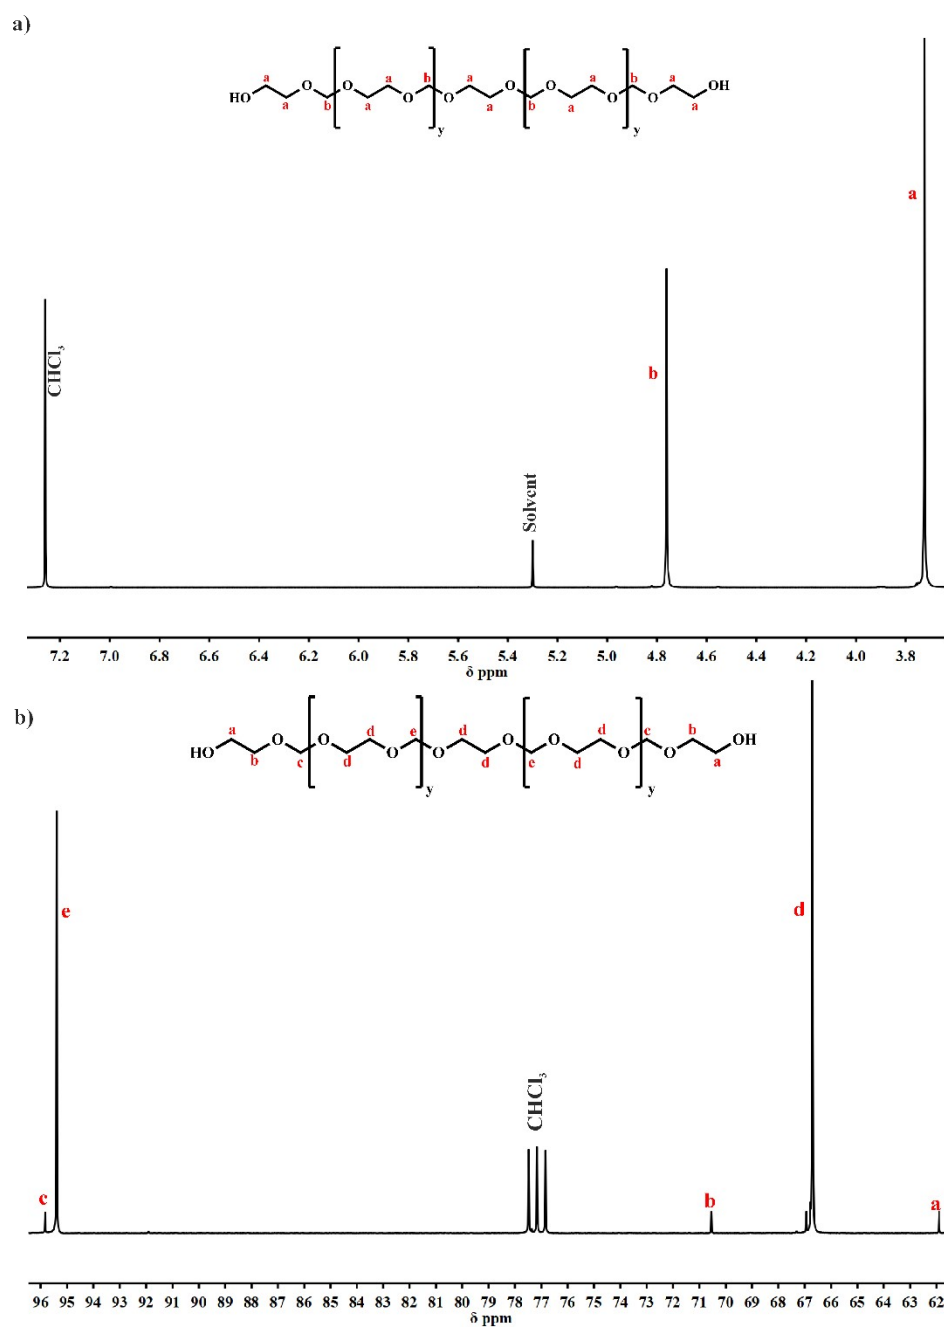

**Figure S2.** The  $^1\text{H}$  and  $^{13}\text{C}$  NMR spectra (400 MHz,  $\text{CDCl}_3$ ) of purified PDXL<sub>7000</sub>

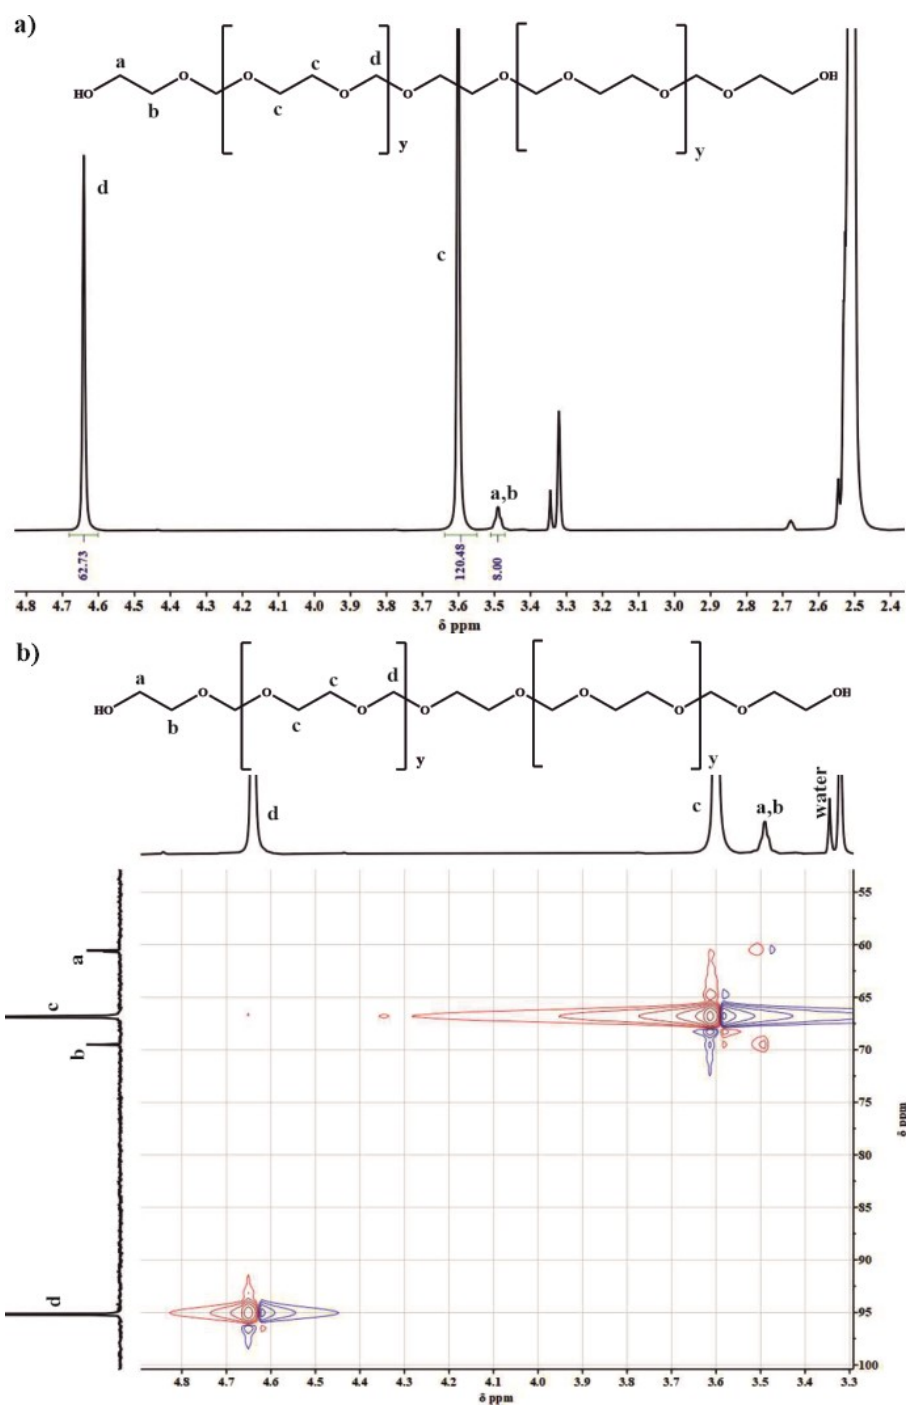

**Figure S3.**  $^1\text{H}$  NMR spectrum, and 2D HSQC NMR (400 MHz,  $\text{DMSO-d}_6$ ) of PDXL<sub>2400</sub> diol

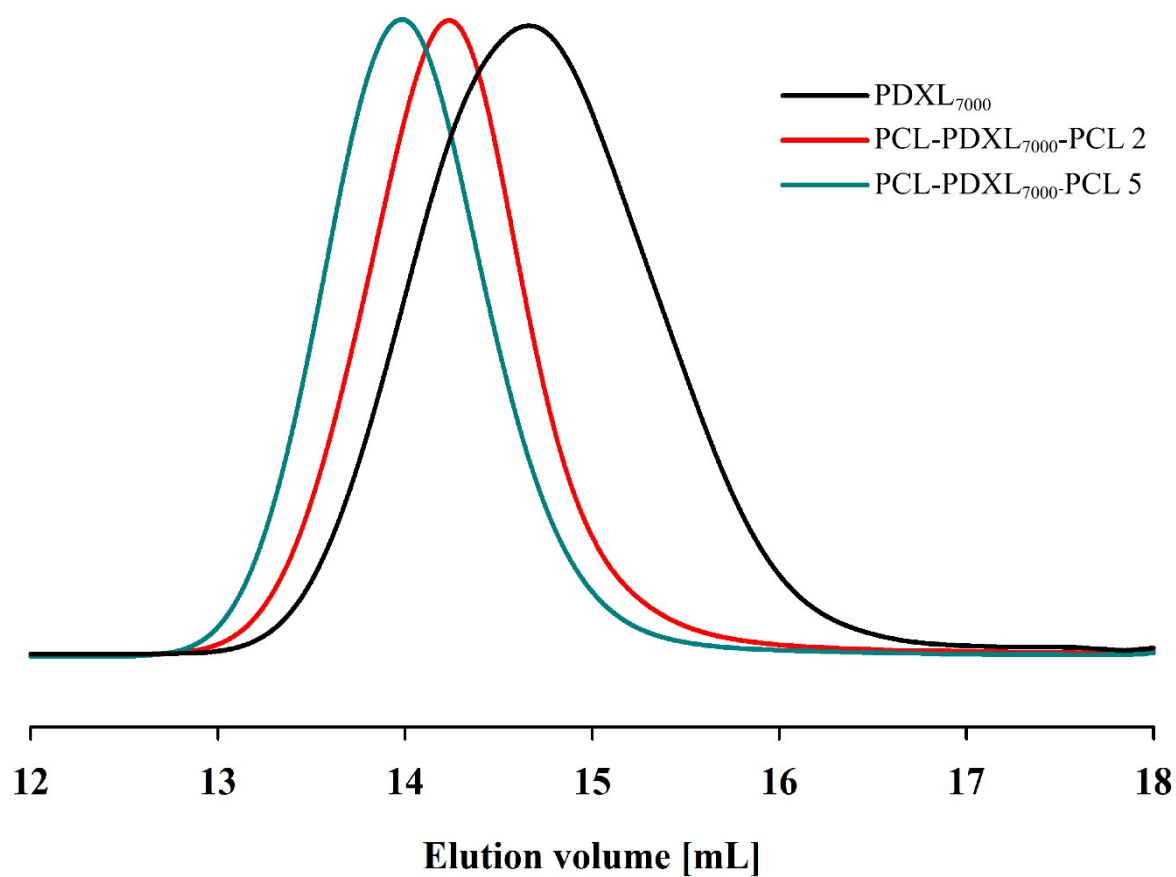

**Figure S4.** SEC trace of polyacetal macroinitiator HO-PDXL<sub>7000</sub>-OH and prepared purified PCL-PDXL<sub>7000</sub>-PCL copolymers

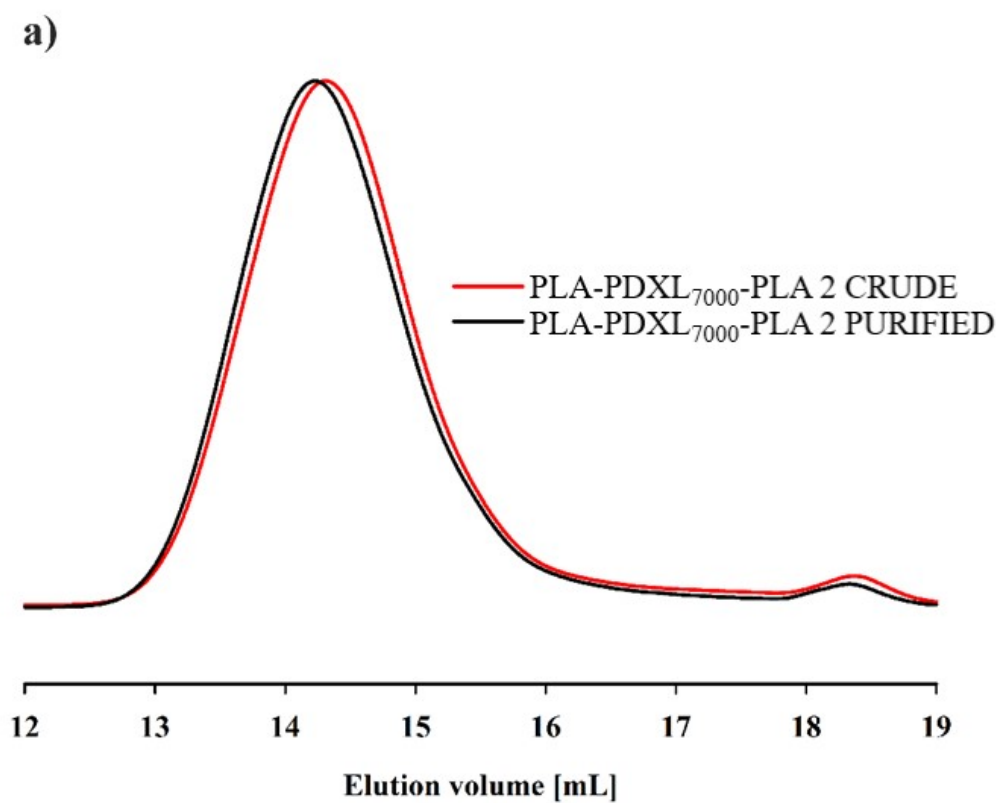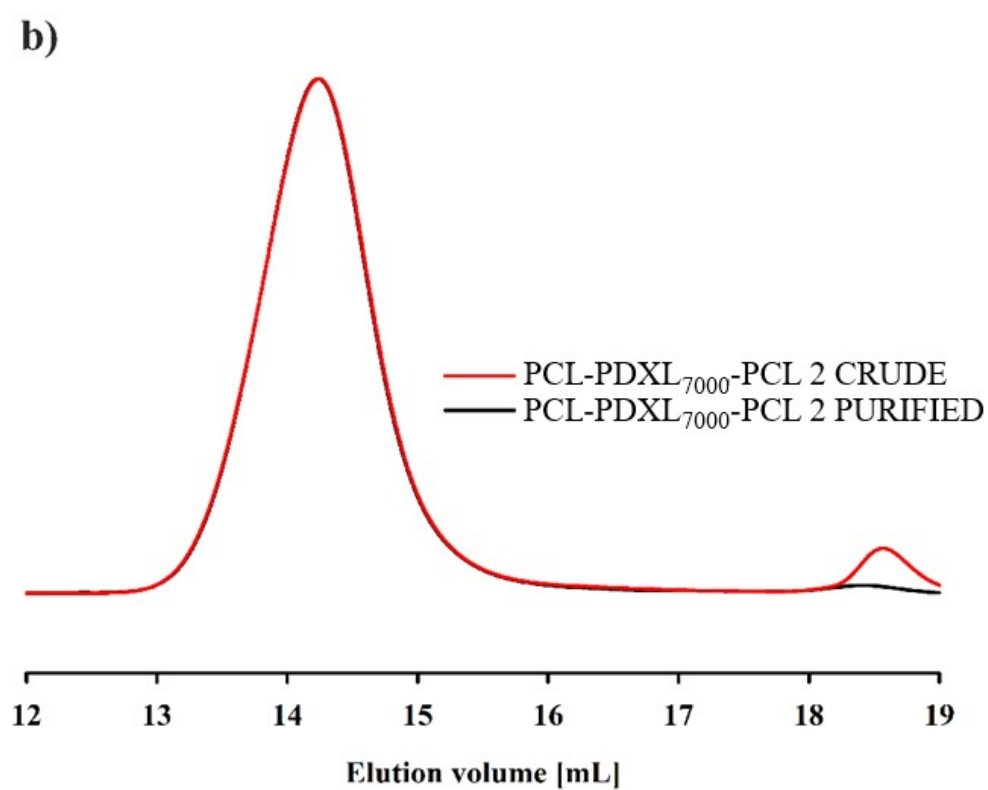

**Figure S5.** The SEC traces of crude and purified a) PLA-PDXL<sub>7000</sub>-PLA copolymer and b) PCL-PDXL<sub>7000</sub>-PCL copolymer



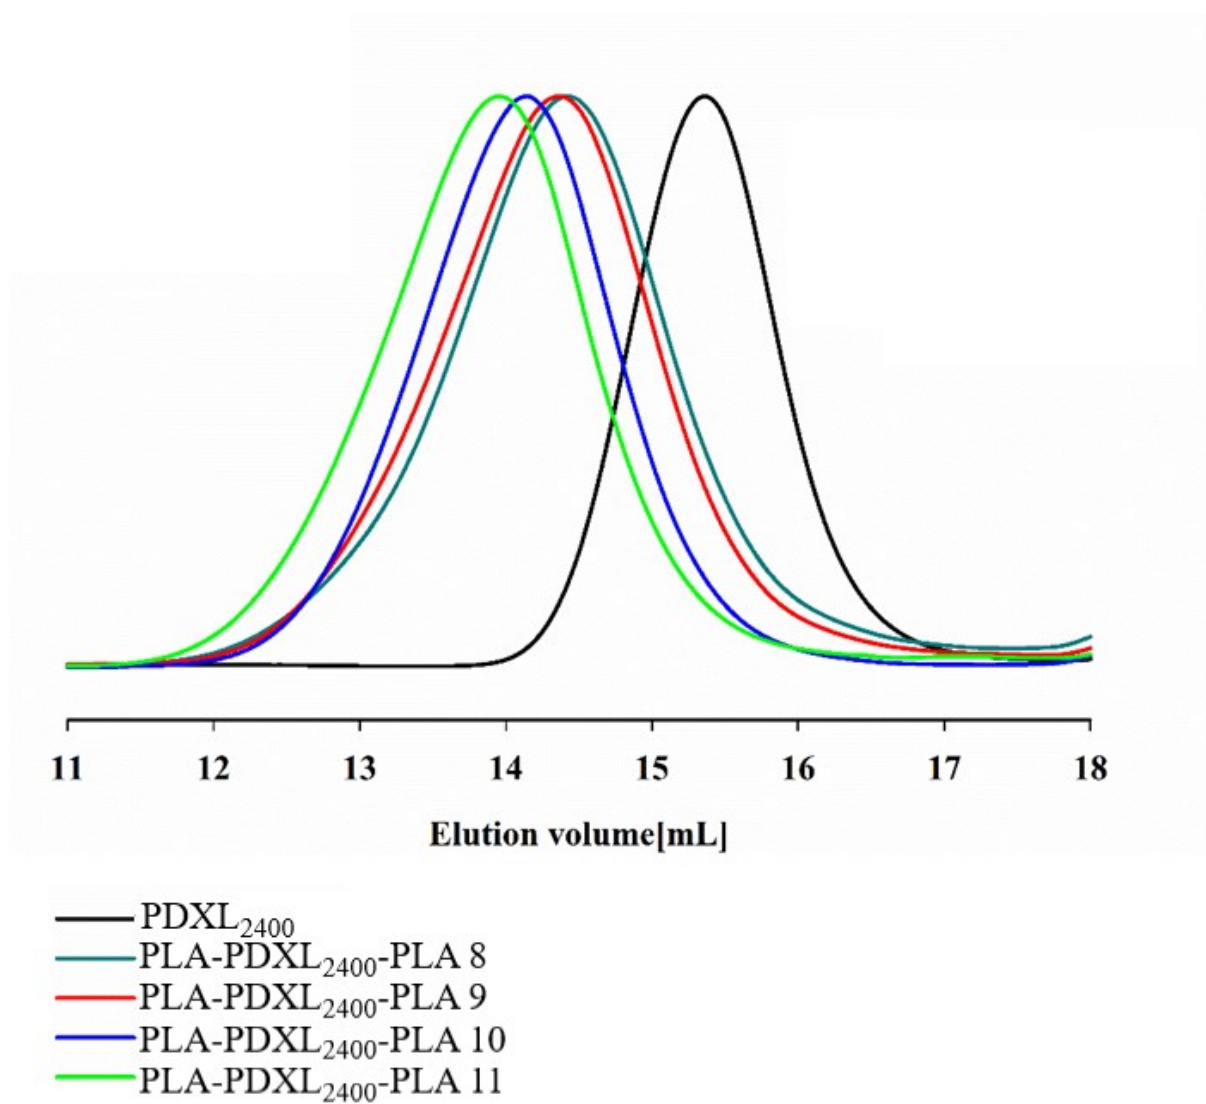

**Figure S6.** SEC curves of polyacetal macroinitiator HO-PDXL<sub>2400</sub>-OH and resulting purified PLA-PDXL<sub>2400</sub>-PLA copolymers.

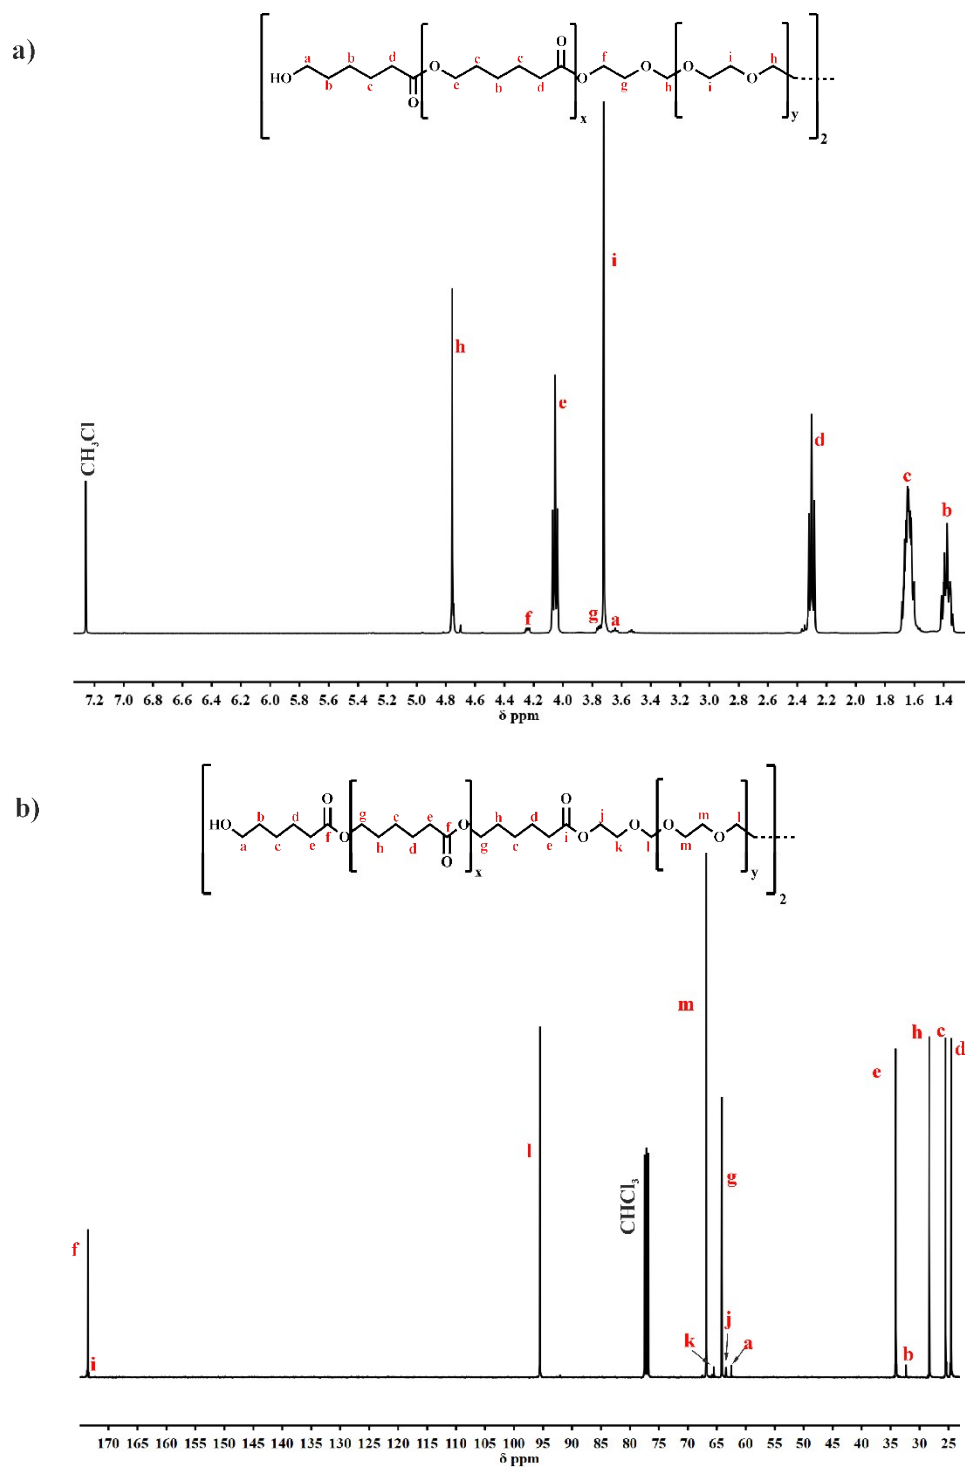

**Figure S7.** The  $^1\text{H}$  and  $^{13}\text{C}$  NMR spectra (400 MHz,  $\text{CDCl}_3$ ) of purified PCL-PDXL<sub>7000</sub>-PCL copolymer.

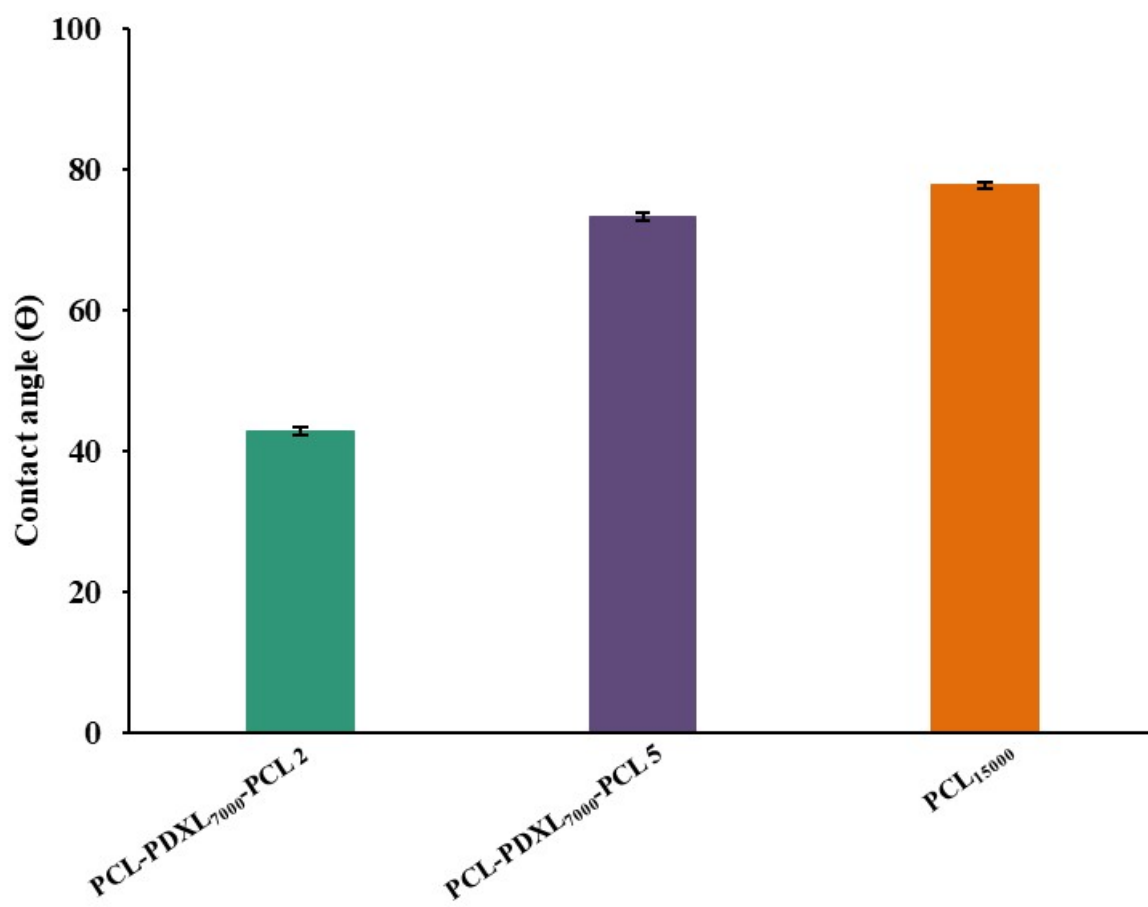

**Figure S8.** Assessment of mean static contact angles of PCL-PDXL<sub>7000</sub>-PCL block copolymers in comparison to pure PDXL<sub>7000</sub> and PCL<sub>14000</sub>.

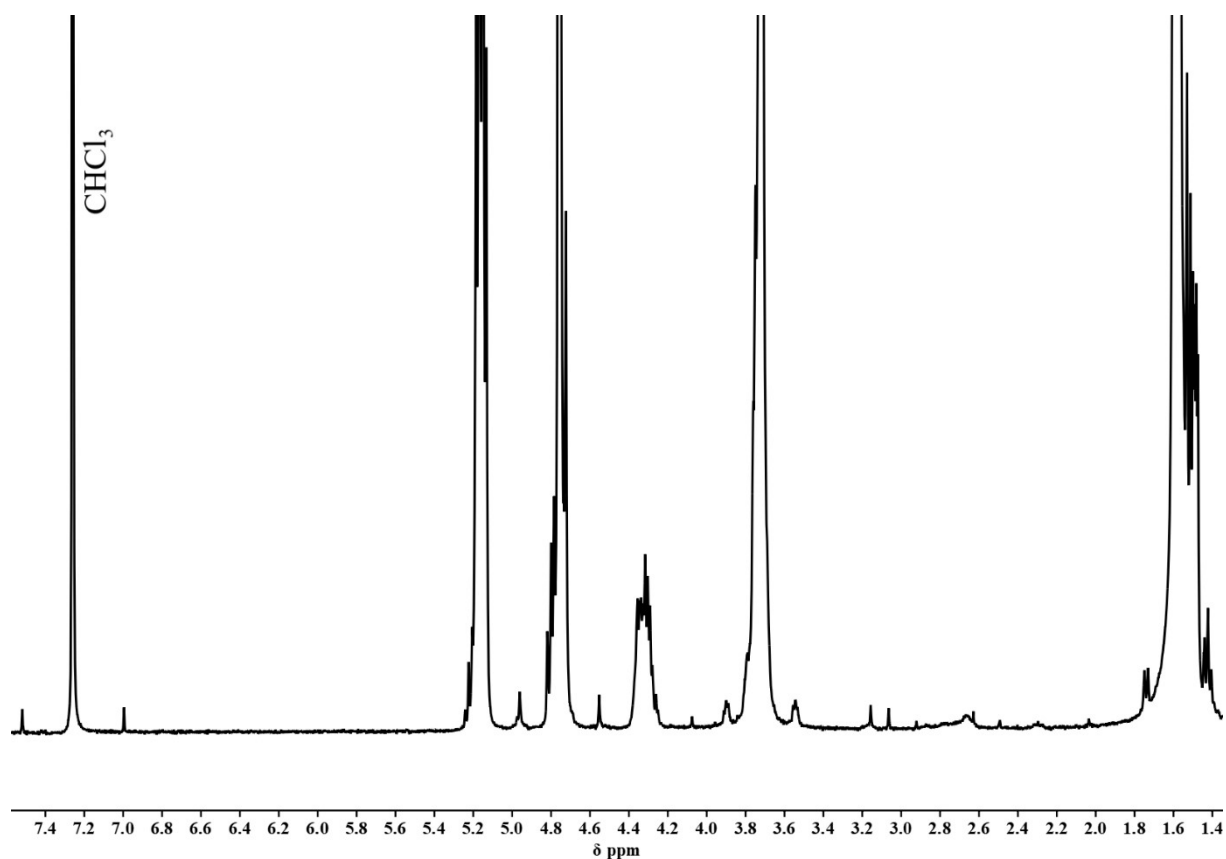

**Figure S9.** The  $^1\text{H}$  NMR of the films for the WCA measurements ( $\text{CDCl}_3$ , 400 MHz)

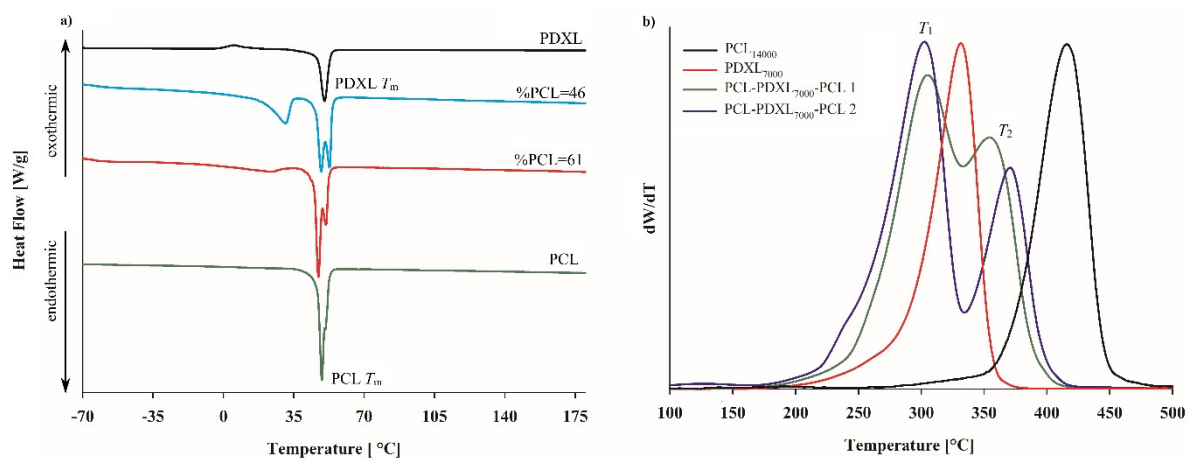

**Figure S10.** a) The DSC thermograms registered during the second scan and b) TGA curves for starting HO-PDXL<sub>7000</sub>-OH diol, PCL<sub>14000</sub>, and PCL-PDXL<sub>7000</sub>-PCL. For DSC analysis samples were heated at 10 °C/min and cooled at 10 °C/min, whereas for TGA measurement samples were heated at 20 °C/min.

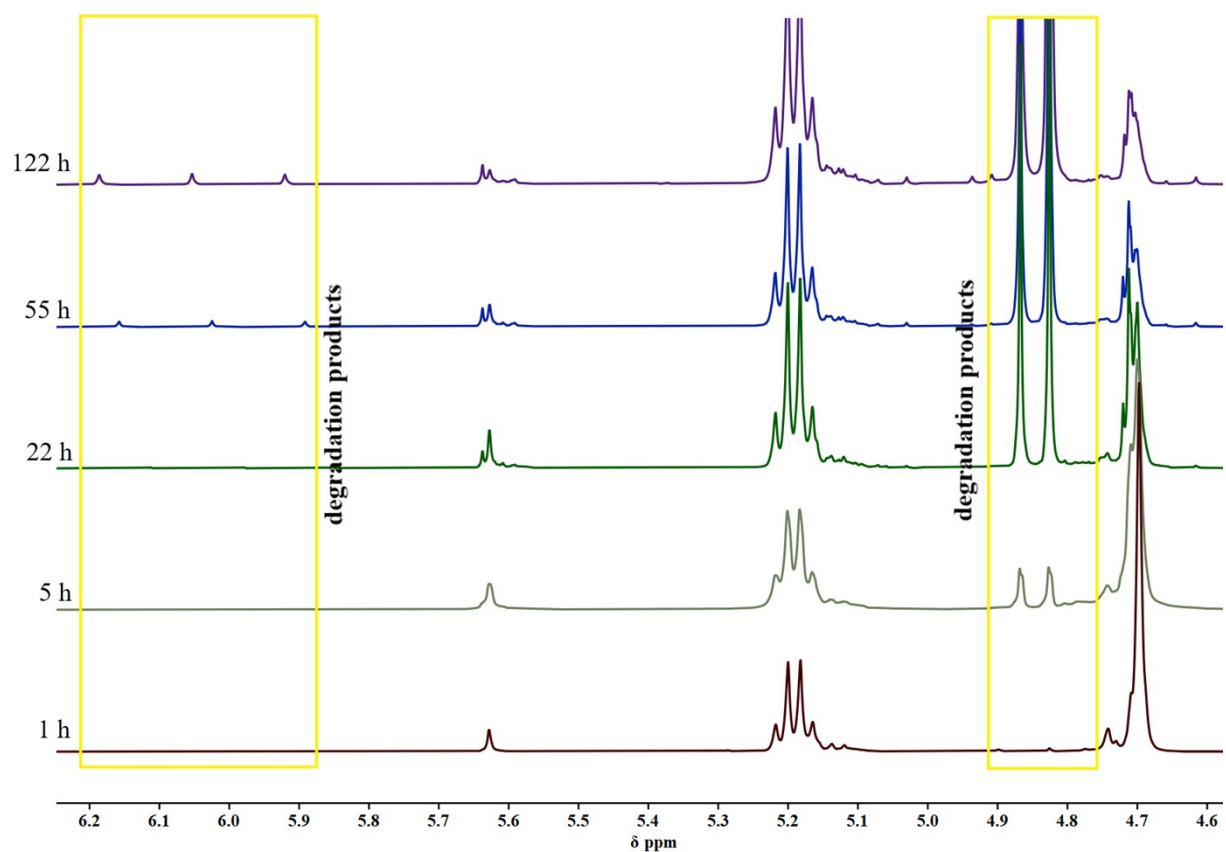

**Figure S11.** Acid induced degradation of PLA-PDXL<sub>7000</sub>-PLA copolymer followed by <sup>1</sup>H NMR spectra([acetal units]:[H<sup>+</sup>] = 10:1), (CD<sub>3</sub>CN, 400 MHz).

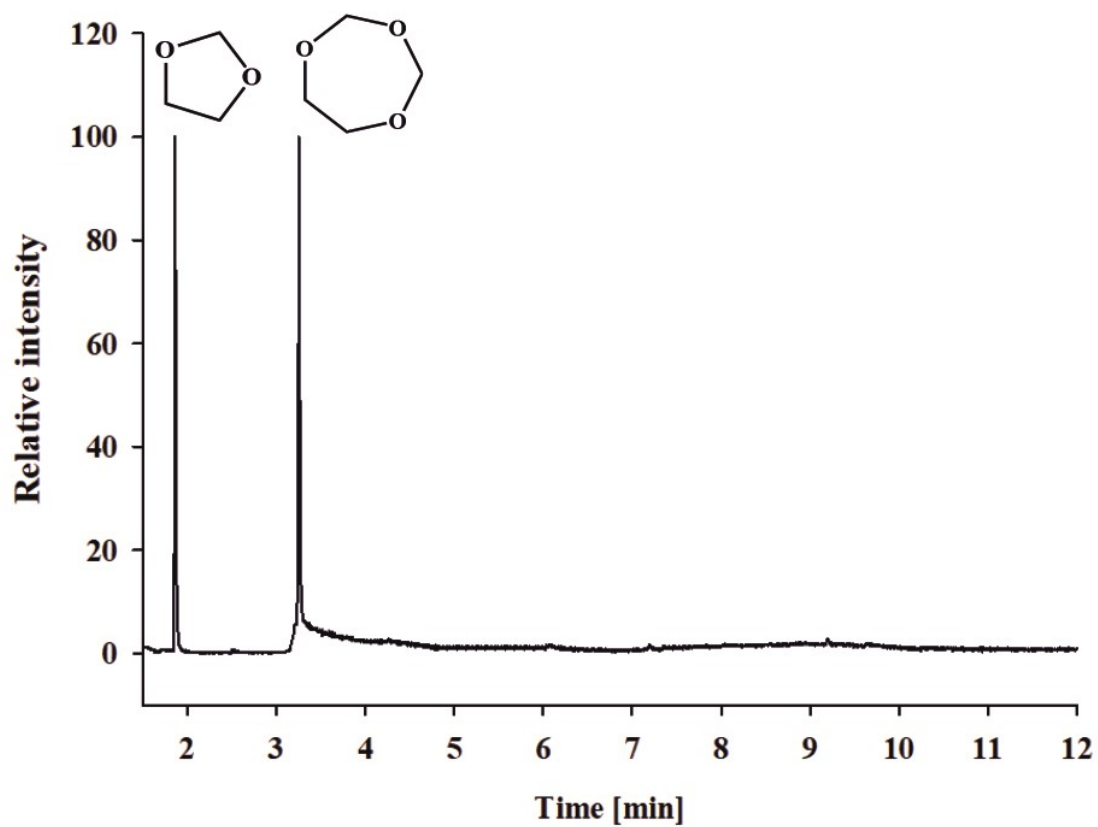

**Figure S12.** The GC spectra of acid induced degradation of PLA-PDXL<sub>7000</sub>-PLA after 122h
