# Supplementary figures and images for: Synthesis and properties of ABA-triblock copolymers from polyester A-blocks and easily degradable polyacetal B-blocks
Source: Royal Society of Chemistry journal article supplement (doi:10.1039/d2py00620k), 2022-01-01

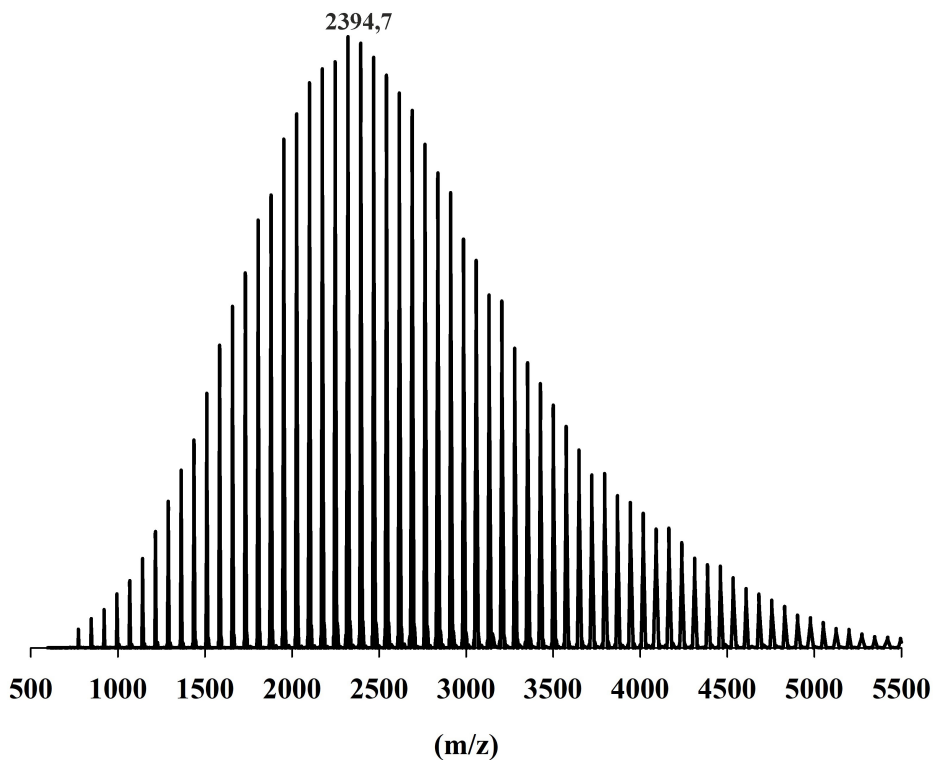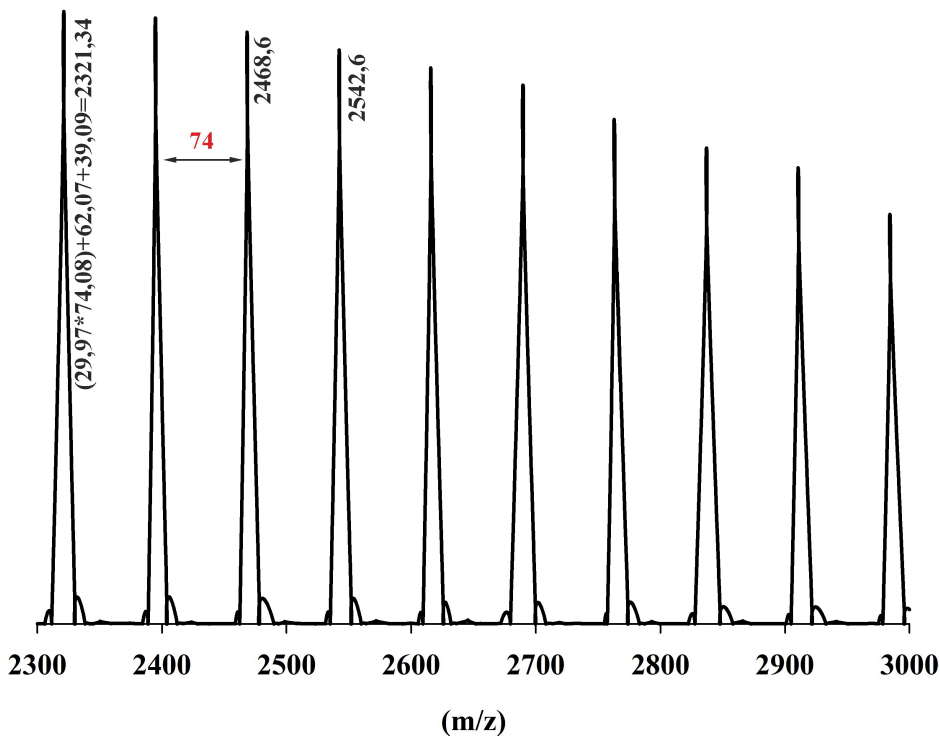

Supplement: d2py00620k1.pdf [file d2py00620k1.pdf]

a)

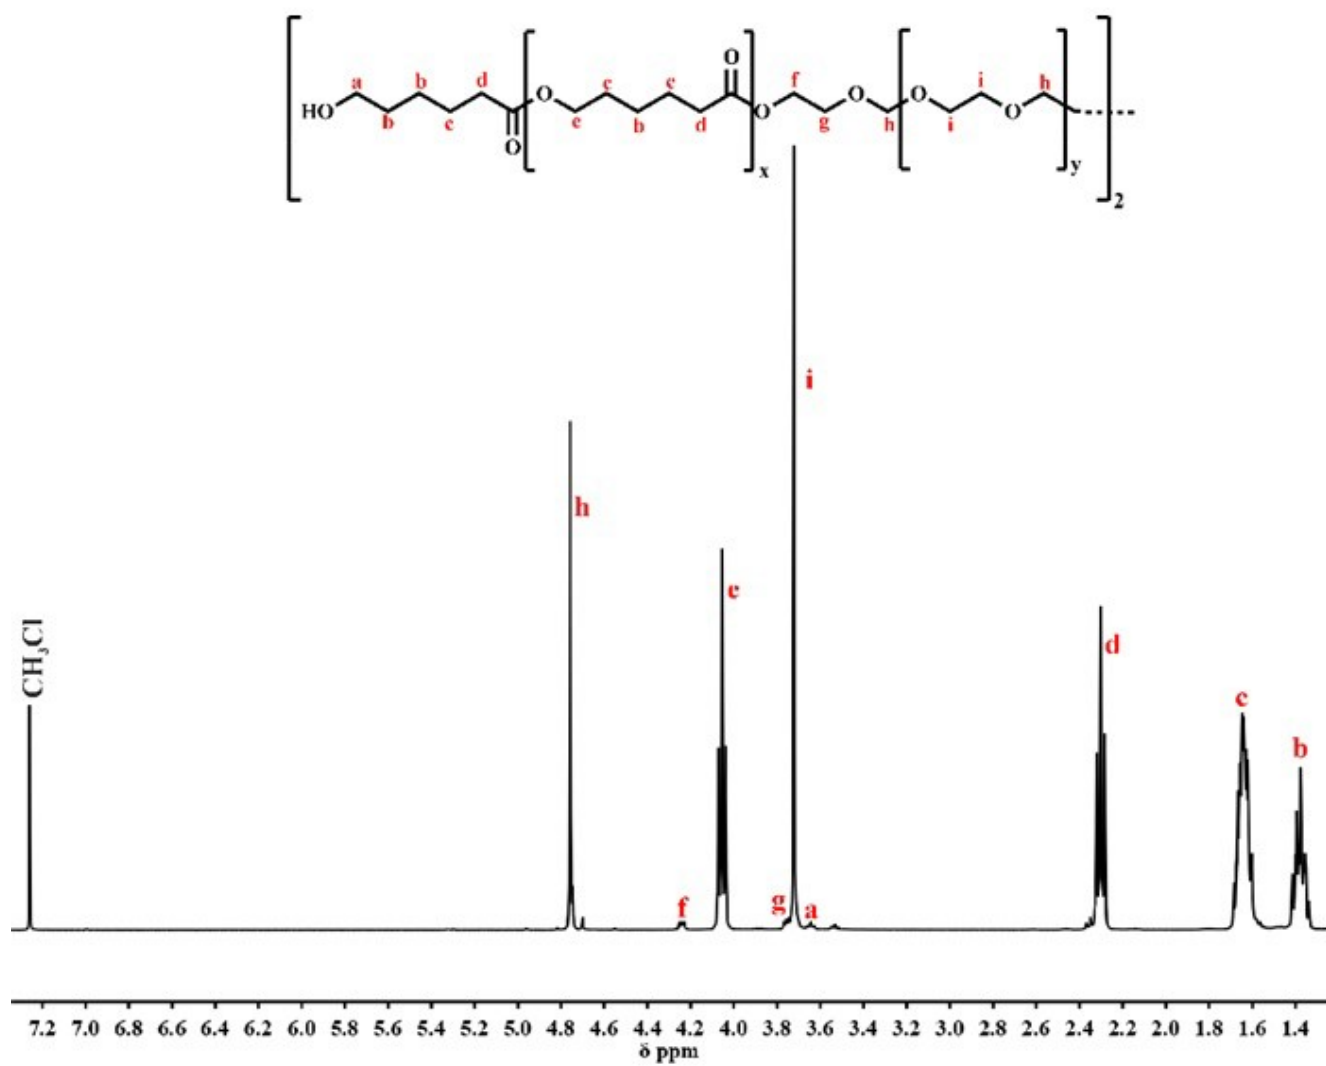

b)

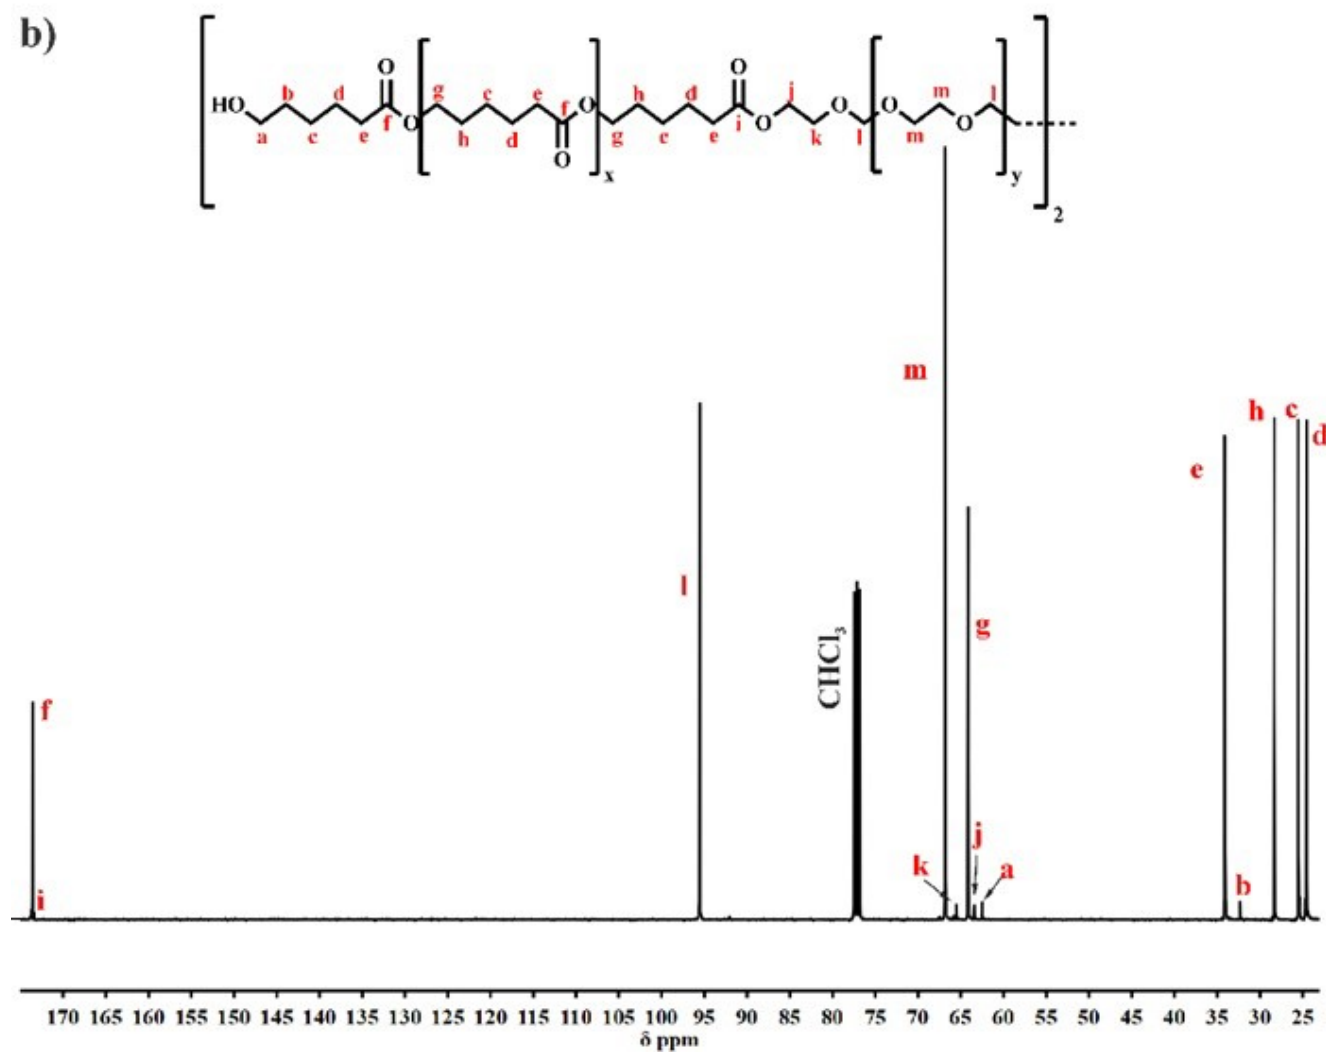

Supplement: d2py00620k10.pdf [file d2py00620k10.pdf]

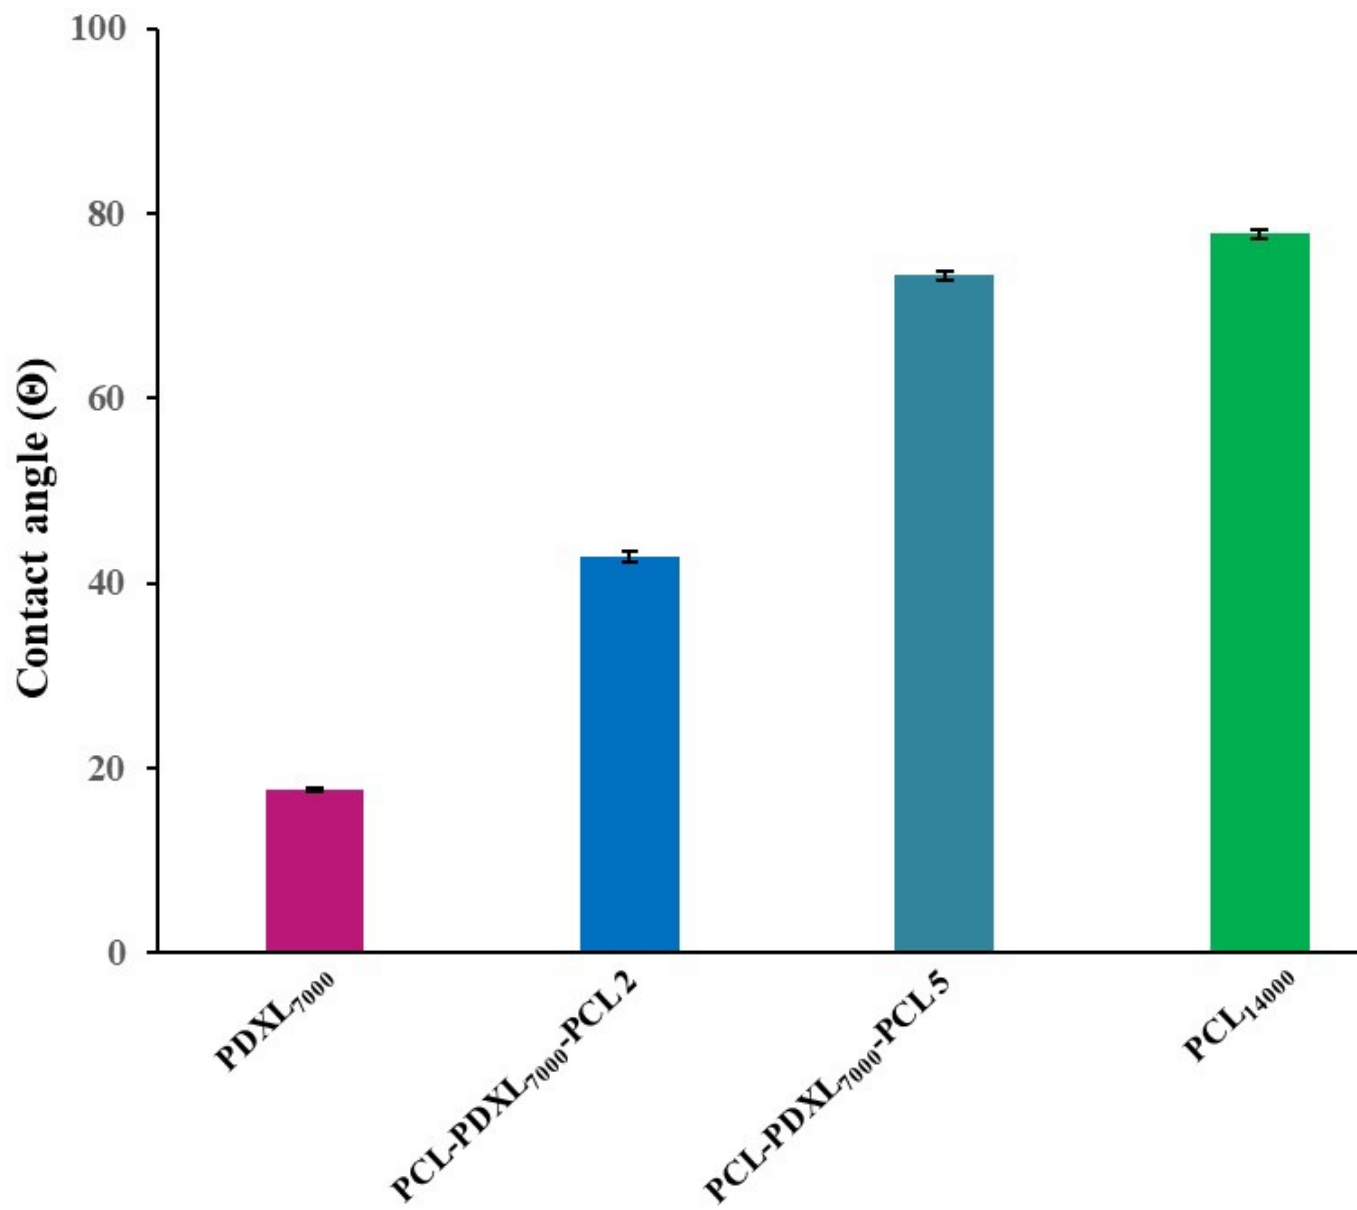

Supplement: d2py00620k11.pdf [file d2py00620k11.pdf]

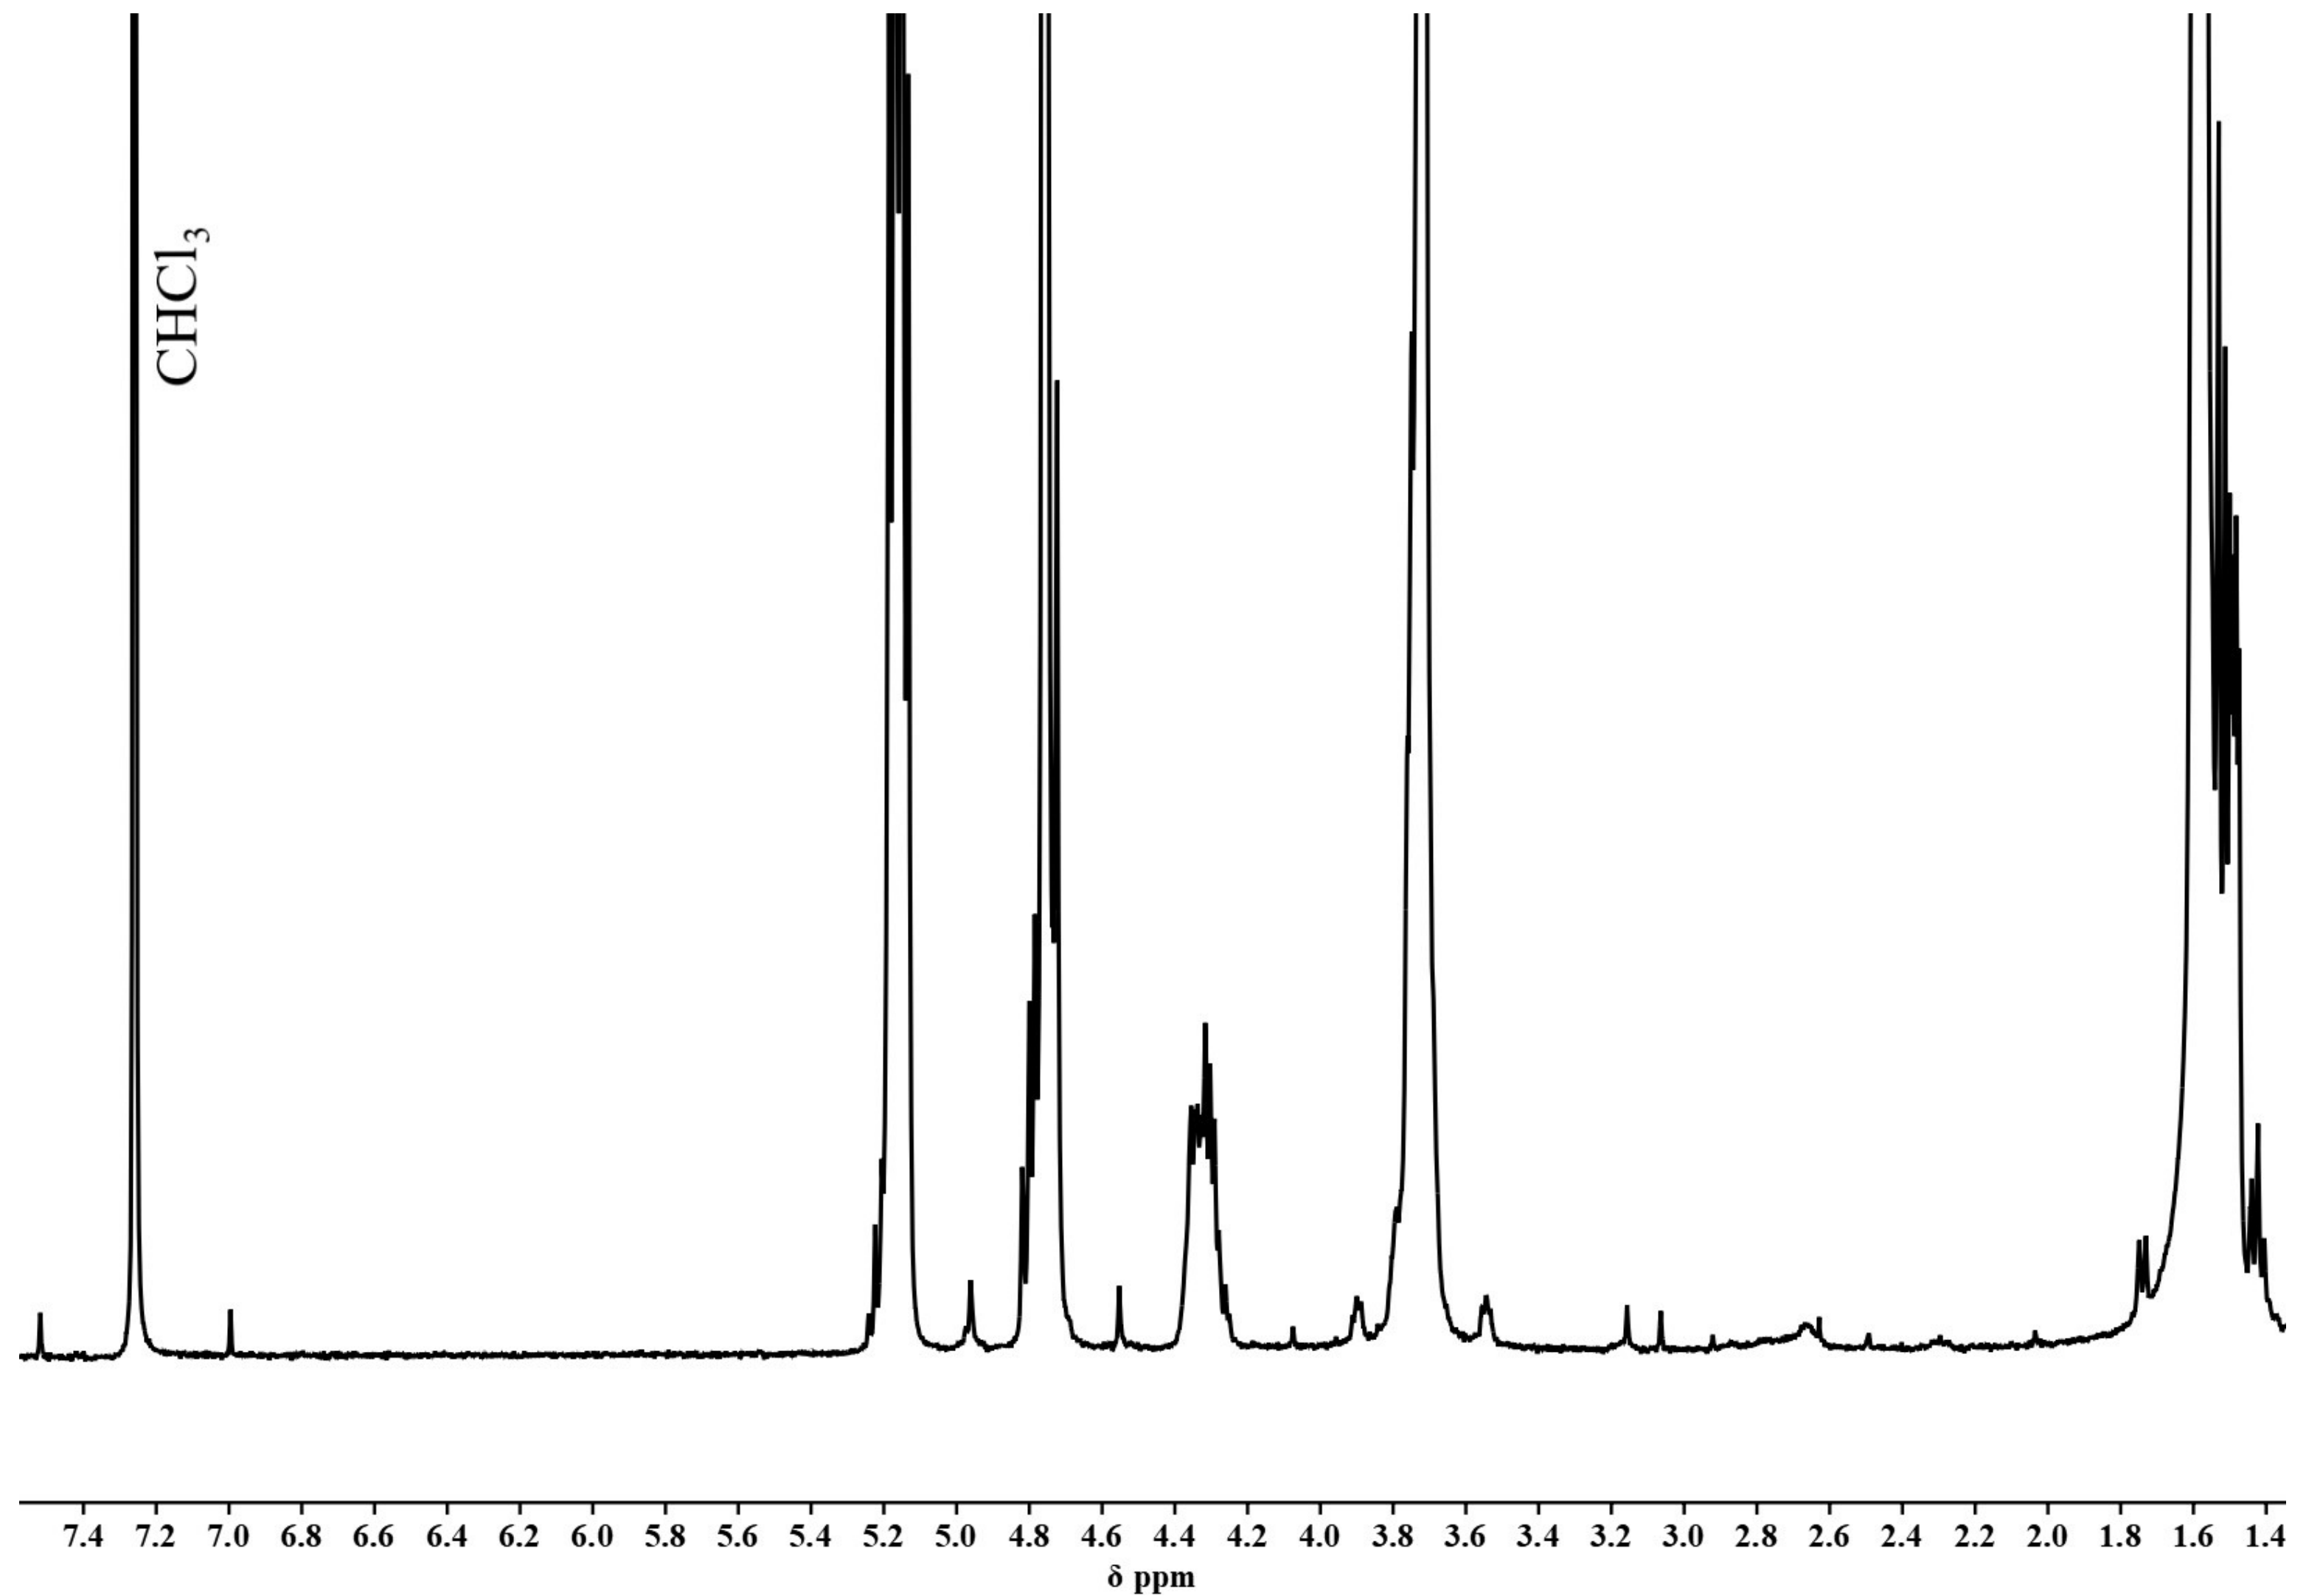

Supplement: d2py00620k12.pdf [file d2py00620k12.pdf]

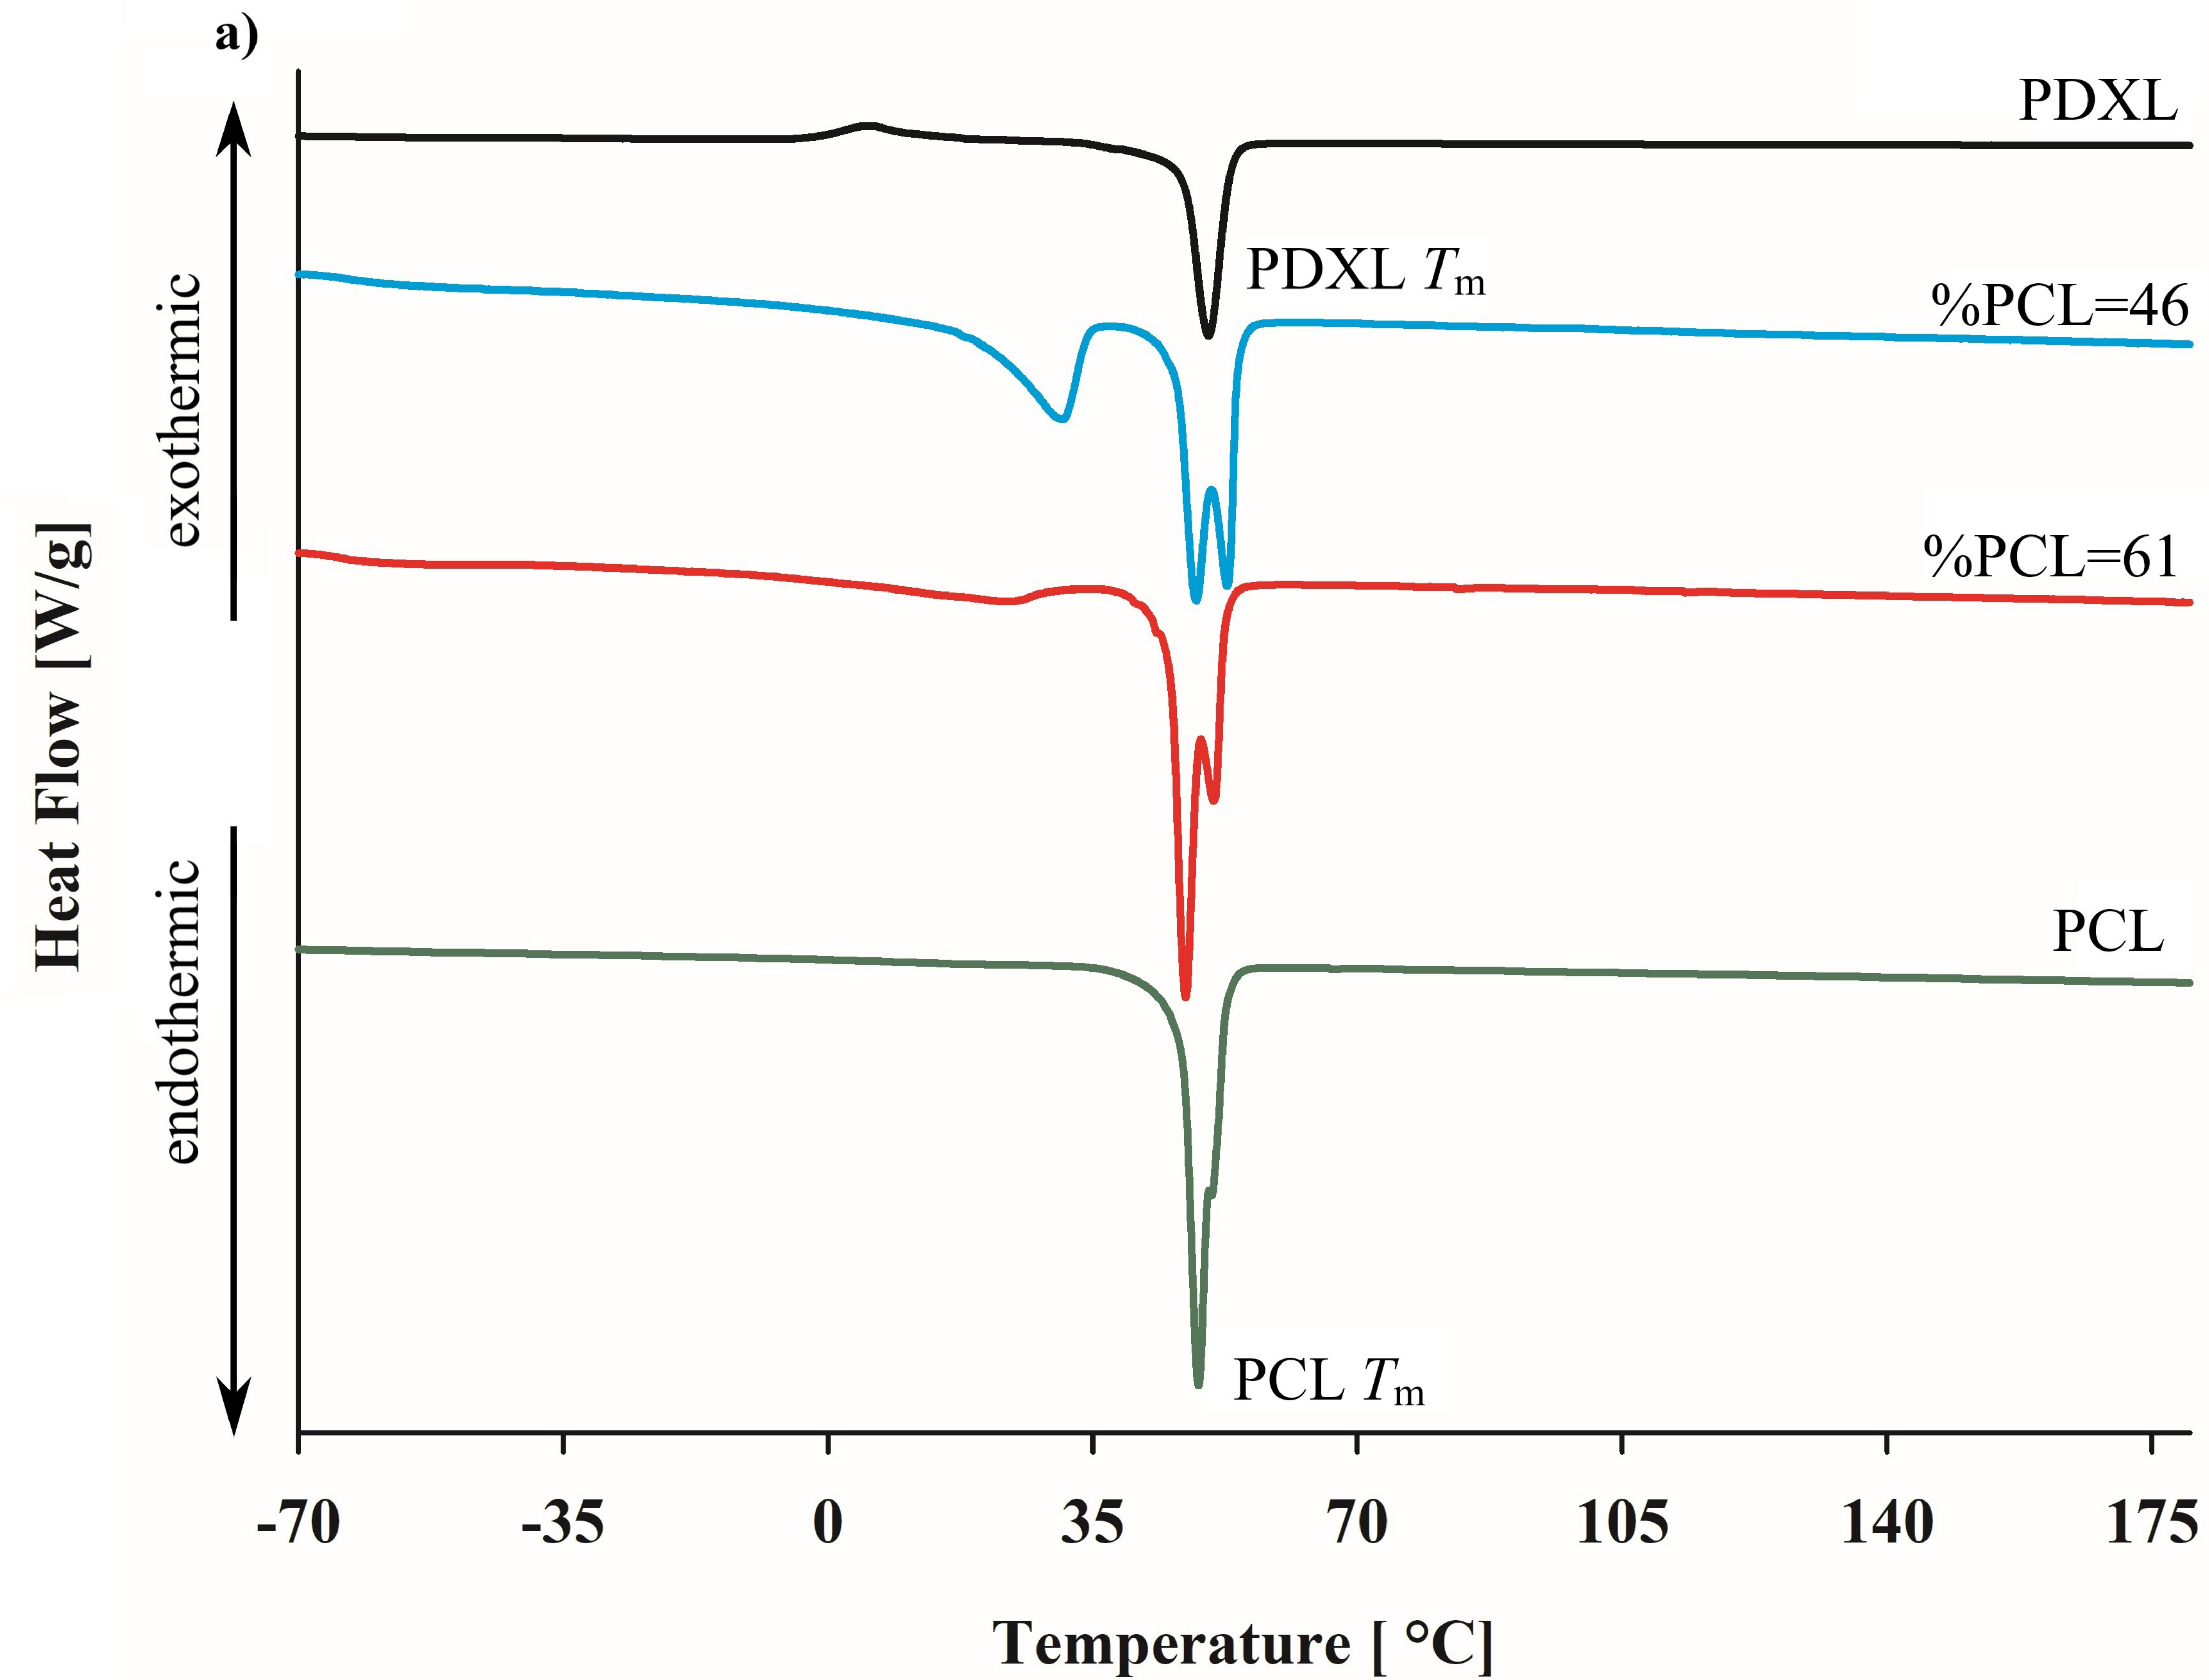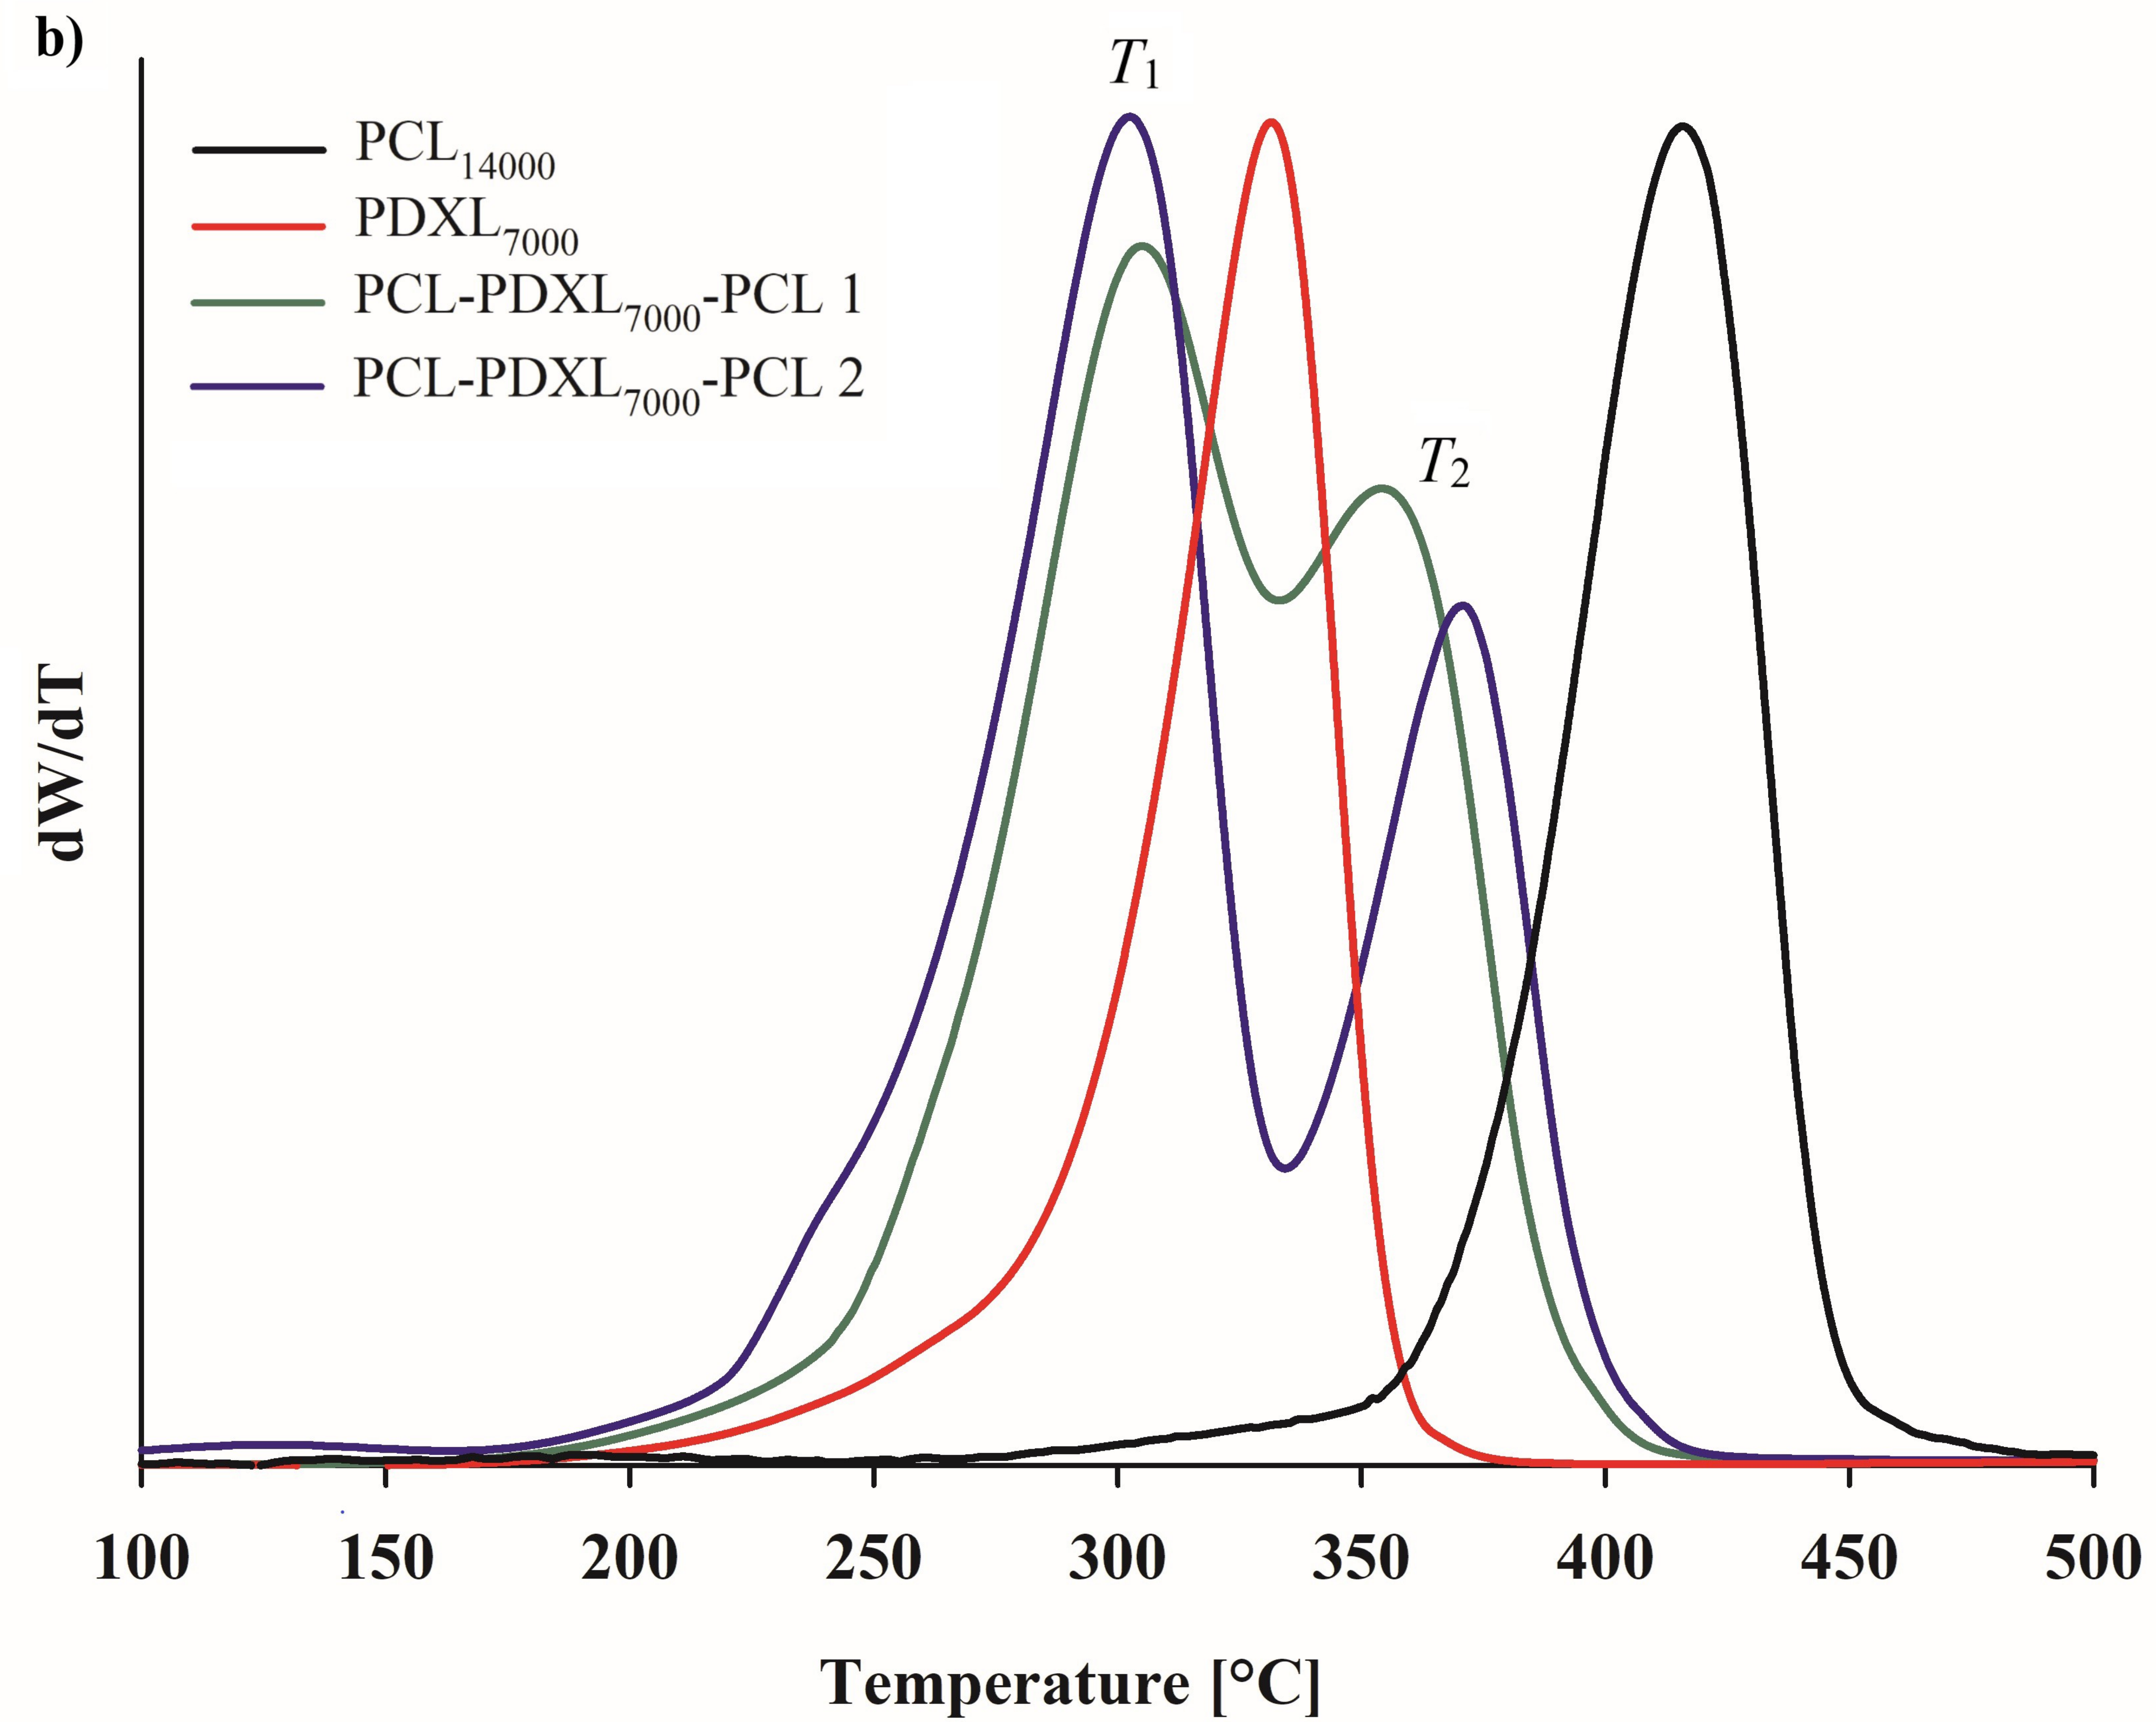

Supplement: d2py00620k2.pdf [file d2py00620k2.pdf]

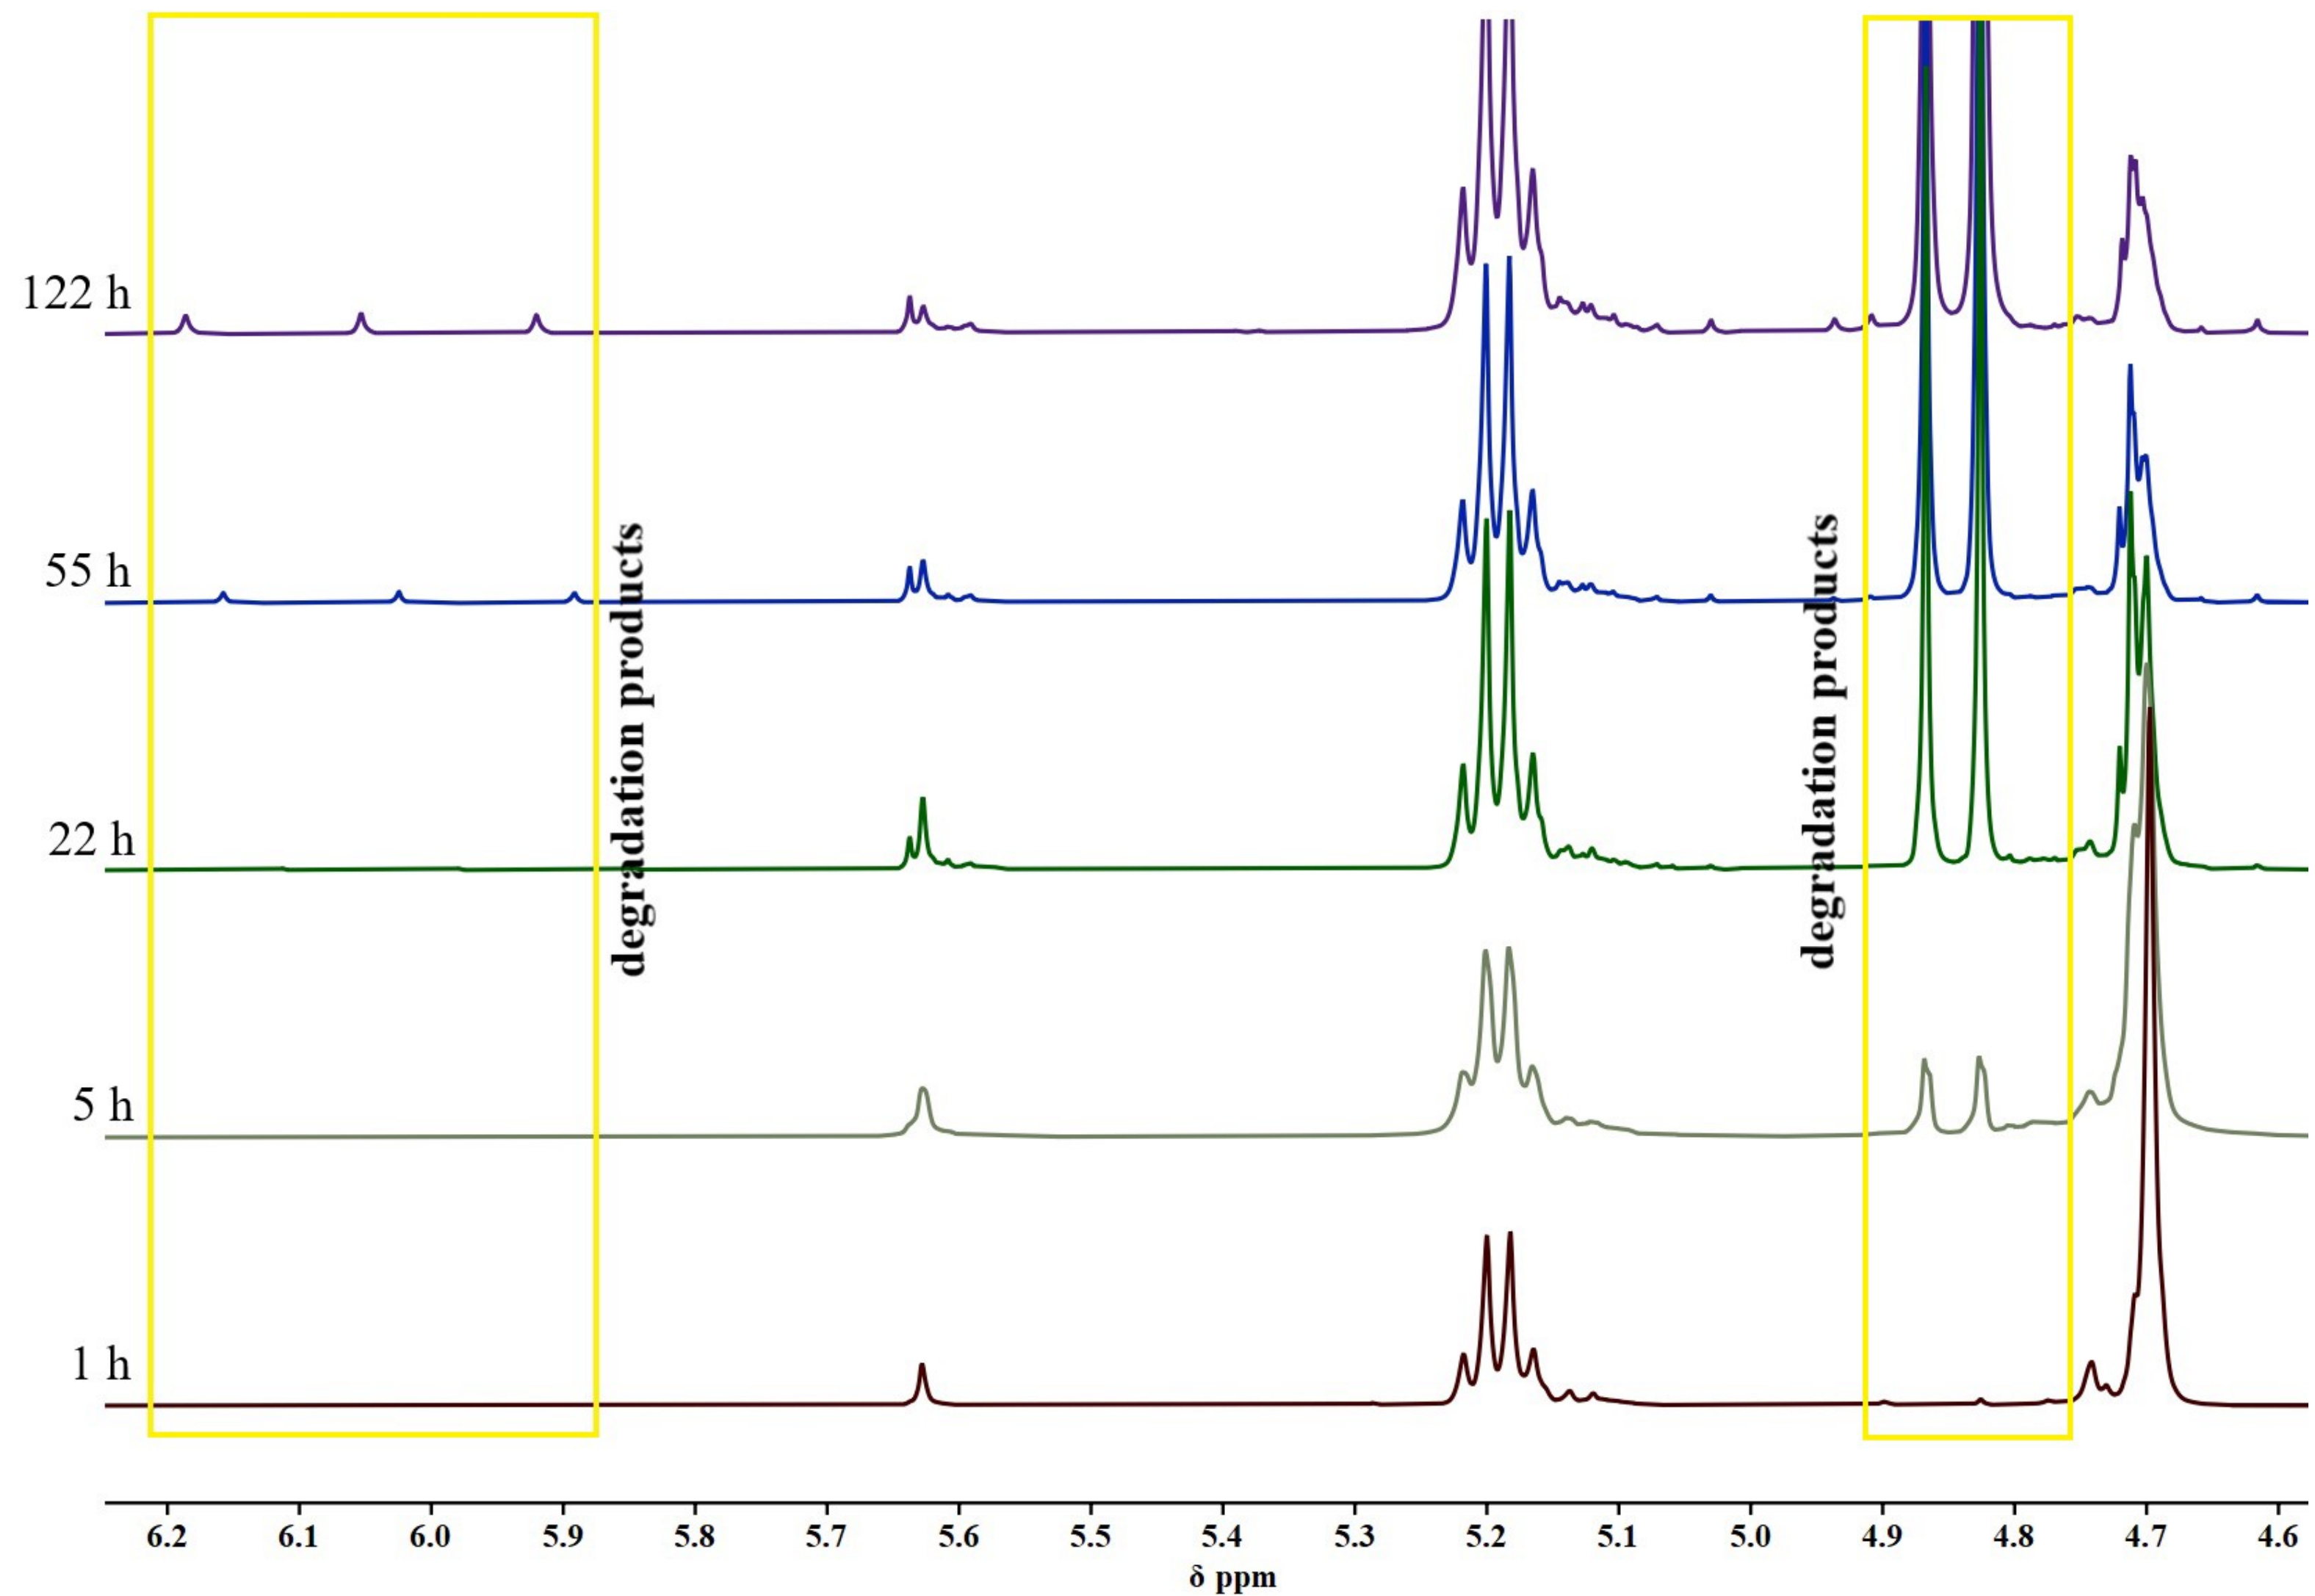

Supplement: d2py00620k3.pdf [file d2py00620k3.pdf]

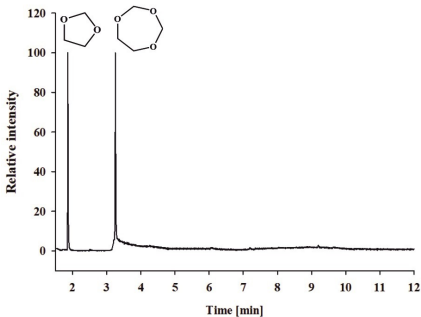

Supplement: d2py00620k4.pdf [file d2py00620k4.pdf]

a)

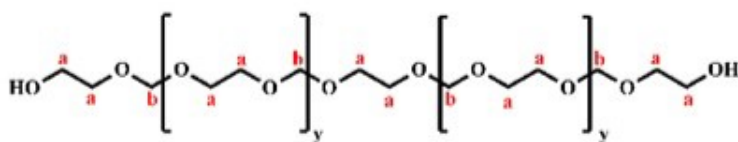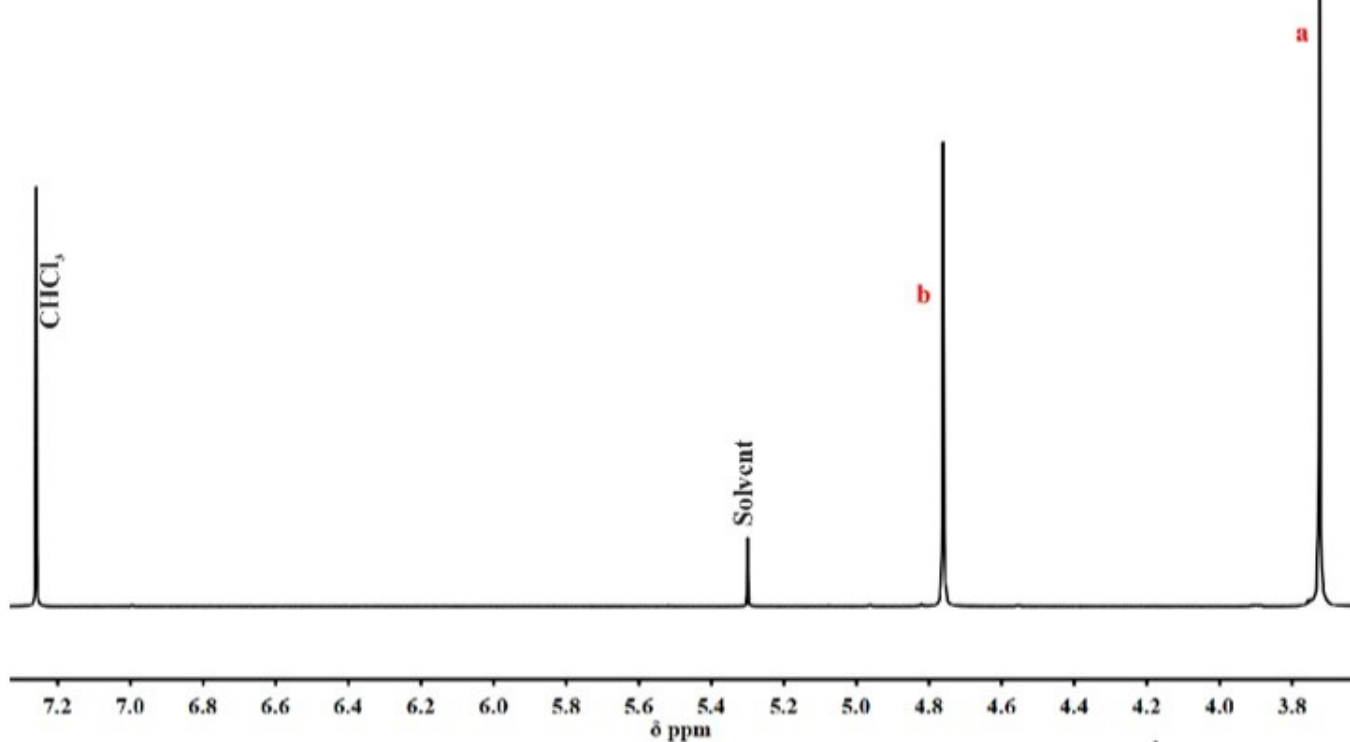

b)

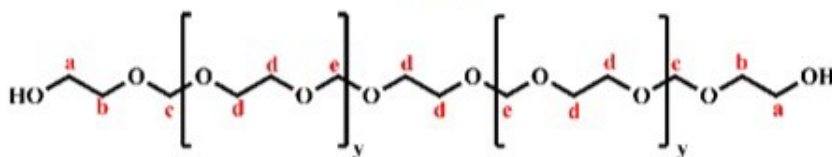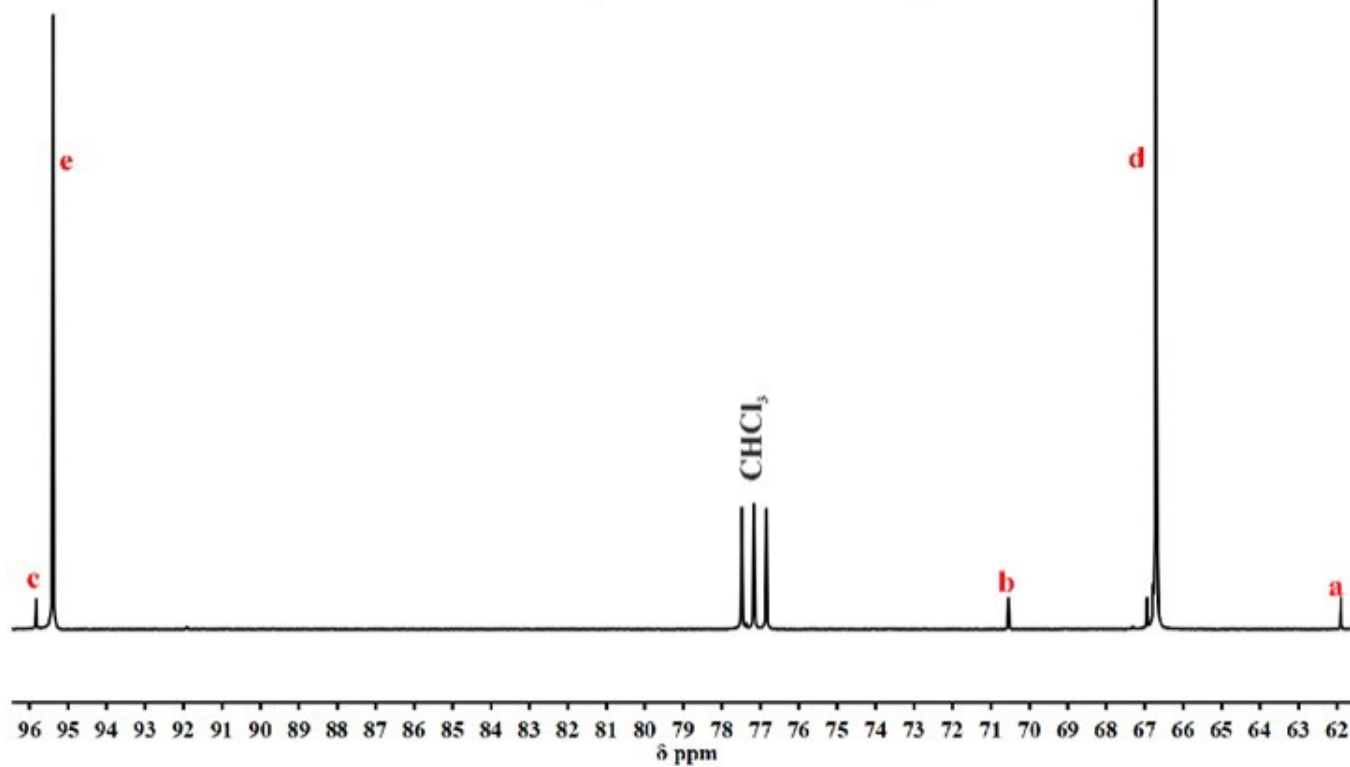

Supplement: d2py00620k5.pdf [file d2py00620k5.pdf]

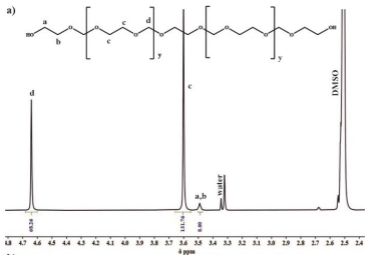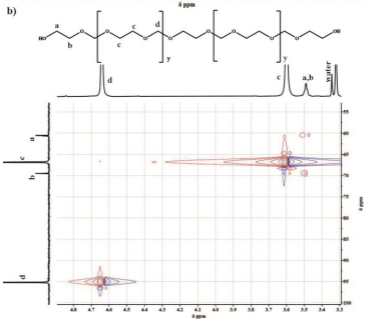

Supplement: d2py00620k6.pdf [file d2py00620k6.pdf]

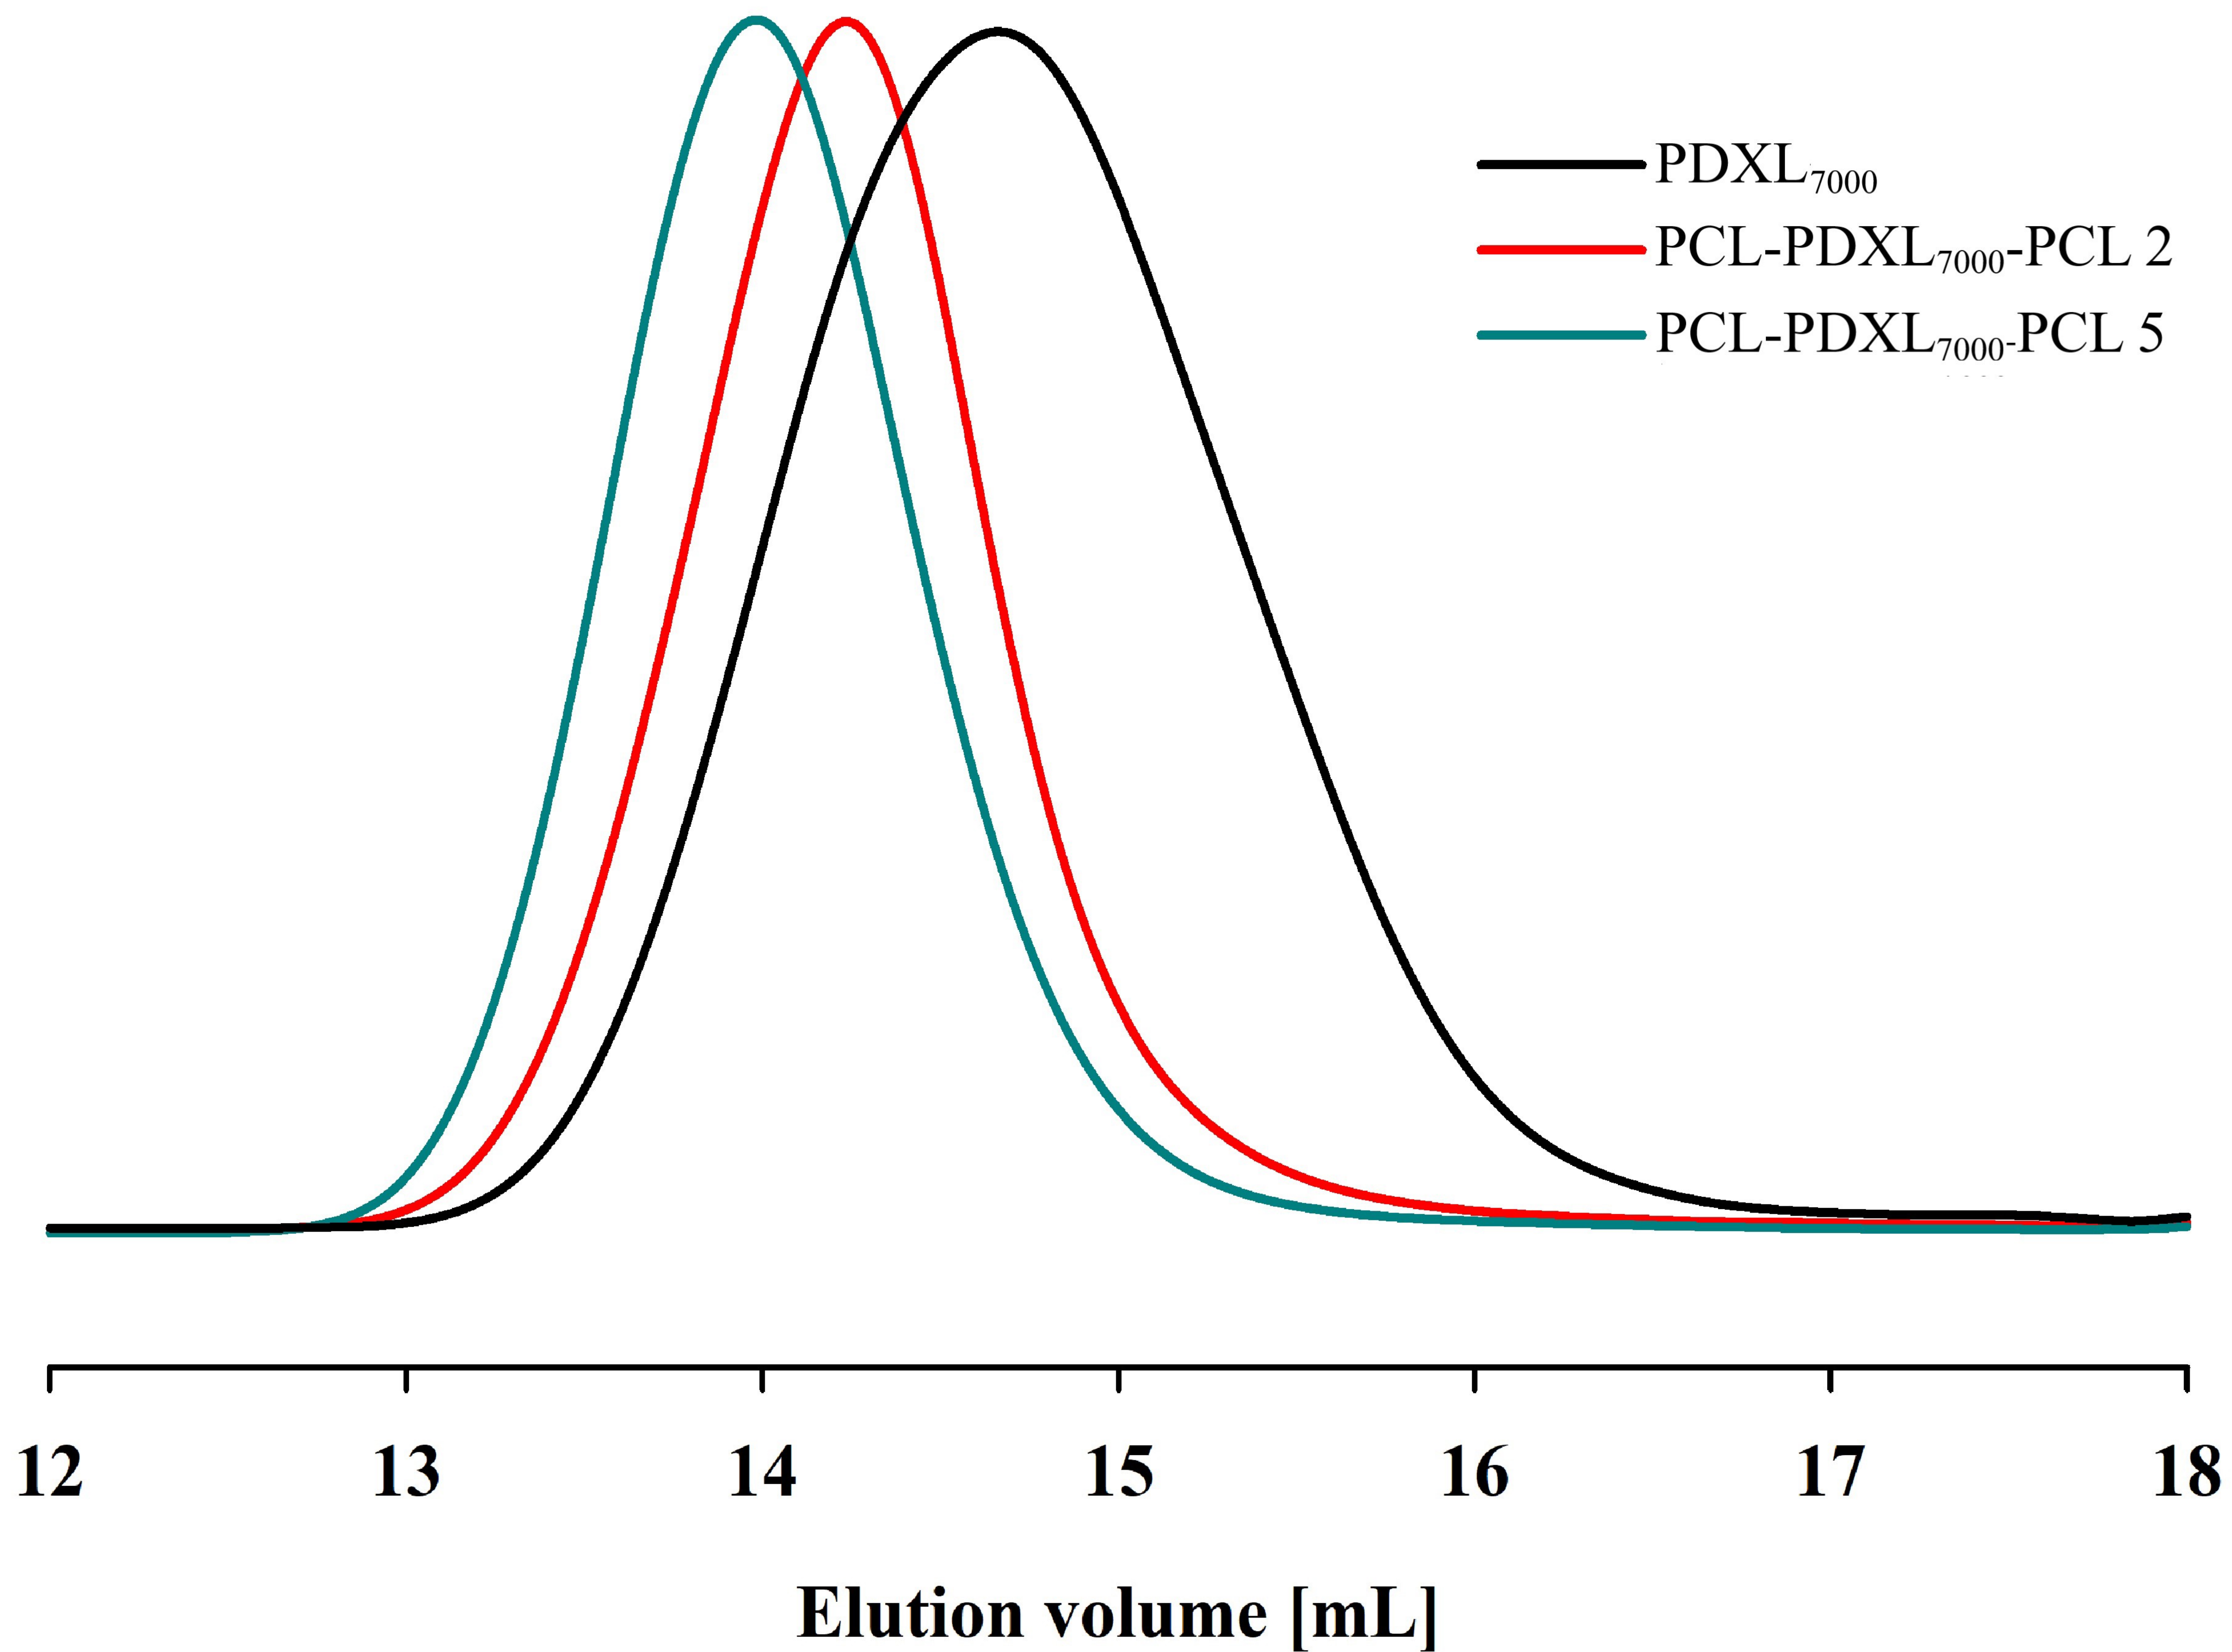

Supplement: d2py00620k7.pdf [file d2py00620k7.pdf]

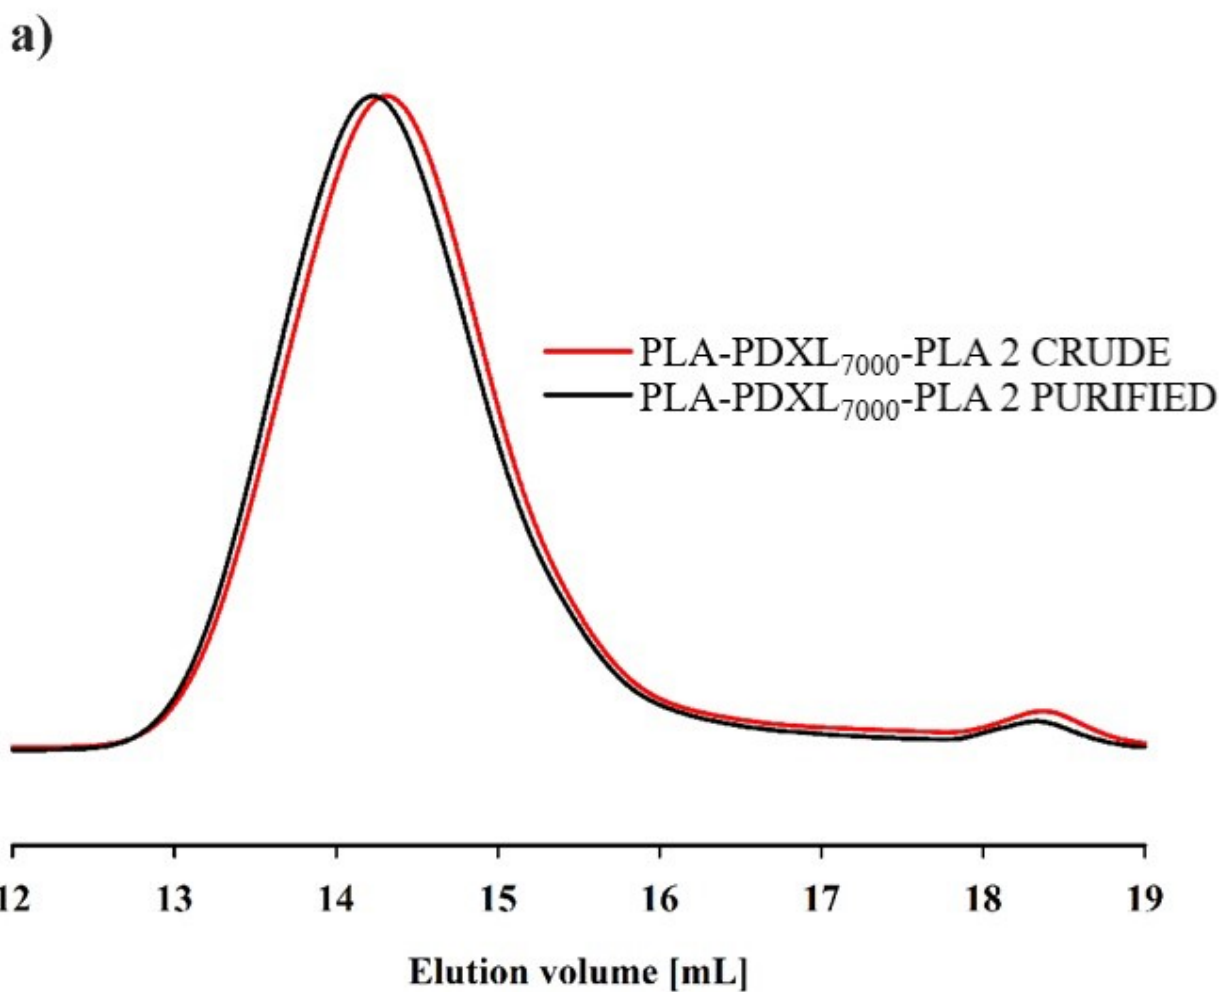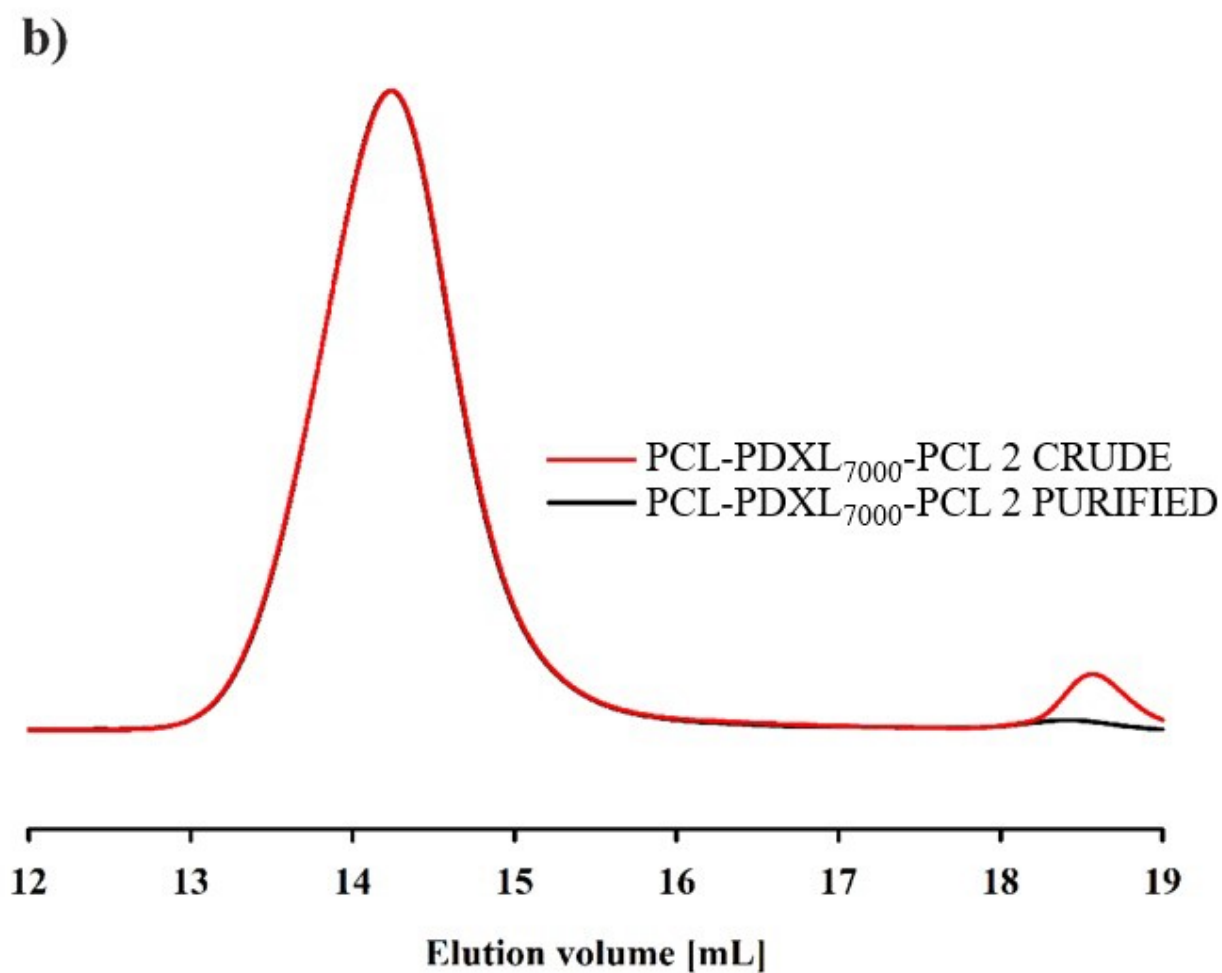

Supplement: d2py00620k8.pdf [file d2py00620k8.pdf]

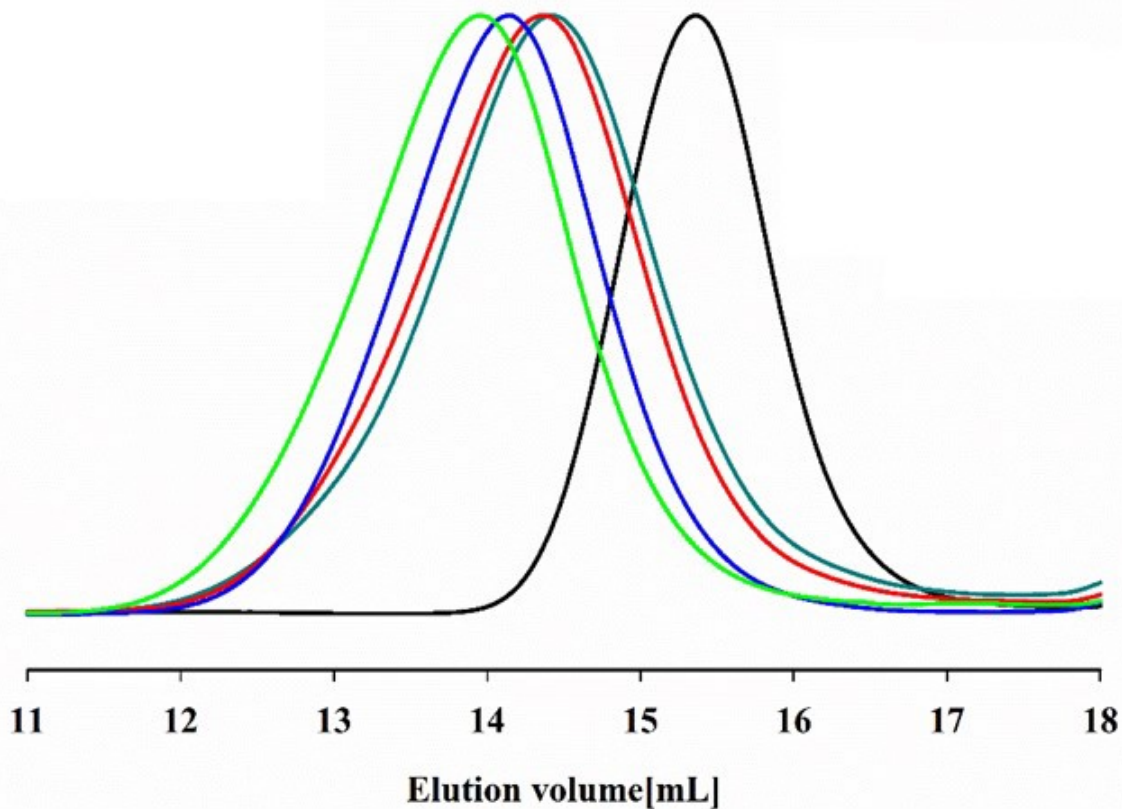

- PDXL<sub>2400</sub>
- PLA-PDXL<sub>2400</sub>-PLA 8
- PLA-PDXL<sub>2400</sub>-PLA 9
- PLA-PDXL<sub>2400</sub>-PLA 10
- PLA-PDXL<sub>2400</sub>-PLA 11

Supplement: d2py00620k9.pdf [file d2py00620k9.pdf]
